# Supplementary material
Source: PubMed Central journal article supplement (PMC7313538)

## Supplementary Appendix

This appendix has been provided by the authors to give readers additional information about their work.

Supplement to: Deeb W, Salvato B, Almeida L, et al. Fornix-region deep brain stimulation–induced memory flashbacks in Alzheimer’s disease. *N Engl J Med* 2019;381:783-5. DOI: [10.1056/NEJMc1905240](https://doi.org/10.1056/NEJMc1905240)

The authors acknowledge the ADvance study participants, investigators, and research teams.

This supplement details the different experiences of the individual patients in the ADvance trial during the initial programming visit (2 weeks post implantation). Each patient's experiences are organized in table by stimulation voltage, contact number, and type. The type of stimulation-induced experience is color coded as follows: **autonomic**, **sensory**, **motor**, **psychiatric**, **visual**, **olfactory**, **non-specific cognitive**, and **memory recollections**. The cells in the table are grayed out until the first experience. Shaded cells indicate absence of testing at that combination of voltage and contact number – this can be due to side effects, patient fatigue, or other complications.

Following this table, each patient's heart rate at each voltage/contact number combination is graphed. Contacts 0, 1, 2, 3 are by convention on the left side of the brain and contacts 8, 9, 10, 11 are on the right side – both are arranged linearly from distal (ventral) to proximal (dorsal).

Patients with vivid memories are distinguished in the table of contents by either one asterisk (vivid spatiotemporal details) or two asterisks (vivid spatiotemporal and phenomenological details – smell, taste, temperature...).

Patient 5 is not included in this document as the records of his initial programming visit are incomplete.

## Table of Contents

|                    |    |
|--------------------|----|
| Patient 1.....     | 3  |
| Patient 2* .....   | 4  |
| Patient 3.....     | 6  |
| Patient 4.....     | 7  |
| Patient 6.....     | 8  |
| Patient 7.....     | 9  |
| Patient 8* .....   | 10 |
| Patient 9.....     | 12 |
| Patient 10.....    | 14 |
| Patient 11.....    | 16 |
| Patient 12.....    | 17 |
| Patient 13.....    | 19 |
| Patient 14* .....  | 21 |
| Patient 15** ..... | 23 |
| Patient 16.....    | 25 |

|                   |    |
|-------------------|----|
| Patient 17.....   | 27 |
| Patient 18.....   | 28 |
| Patient 19.....   | 29 |
| Patient 20.....   | 31 |
| Patient 21.....   | 32 |
| Patient 22.....   | 33 |
| Patient 23*.....  | 35 |
| Patient 24.....   | 37 |
| Patient 25.....   | 39 |
| Patient 26.....   | 40 |
| Patient 27.....   | 41 |
| Patient 28**..... | 42 |
| Patient 29**..... | 44 |
| Patient 30.....   | 46 |
| Patient 31.....   | 48 |
| Patient 32.....   | 50 |
| Patient 33**..... | 52 |
| Patient 34.....   | 54 |
| Patient 35.....   | 55 |
| Patient 36**..... | 57 |
| Patient 37*.....  | 59 |
| Patient 38.....   | 61 |
| Patient 39**..... | 63 |
| Patient 40.....   | 65 |
| Patient 41*.....  | 67 |
| Patient 42.....   | 69 |

# Patient 1

| Contact number | Voltage (V) |   |   |                  |              |   |                  |                  |                  |    |
|----------------|-------------|---|---|------------------|--------------|---|------------------|------------------|------------------|----|
|                | 1           | 2 | 3 | 4                | 5            | 6 | 7                | 8                | 9                | 10 |
| 0              |             |   |   | Warmth           | Palpitations |   |                  |                  |                  |    |
| 1              |             |   |   |                  |              |   |                  | Warmth in chest  | Warmth Dizziness |    |
| 2              |             |   |   |                  |              |   |                  |                  |                  |    |
| 3              |             |   |   |                  |              |   |                  |                  |                  |    |
| 8              |             |   |   | Warmth Pulsation |              |   |                  |                  |                  |    |
| 9              |             |   |   |                  |              |   |                  | Warmth Dizziness |                  |    |
| 10             |             |   |   |                  |              |   | Dizziness Warmth | Warmth           |                  |    |
| 11             |             |   |   |                  |              |   |                  |                  |                  |    |

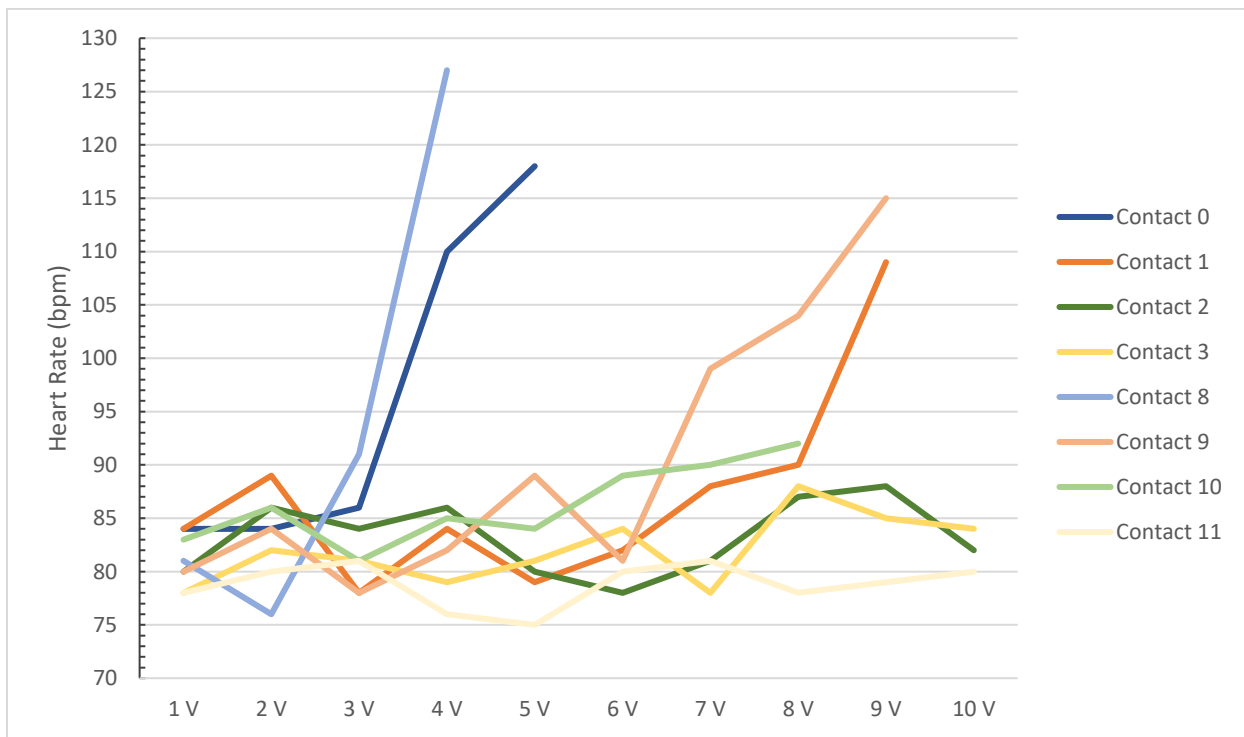

# Patient 2

| Contact number | Voltage (V) |   |        |                        |                                 |                                         |                                                                  |                                                                 |                      |    |
|----------------|-------------|---|--------|------------------------|---------------------------------|-----------------------------------------|------------------------------------------------------------------|-----------------------------------------------------------------|----------------------|----|
|                | 1           | 2 | 3      | 4                      | 5                               | 6                                       | 7                                                                | 8                                                               | 9                    | 10 |
| 0              |             |   | Warmth | Buzzing in head        | Warmth<br>Buzzing in head       |                                         |                                                                  |                                                                 |                      |    |
| 1              |             |   |        | Buzzing in head        |                                 | Warmth<br>Tingling in chest             | Tingling in chest<br>Warmth                                      | Warmth                                                          | Warmth               |    |
| 2              |             |   |        |                        | Warmth                          |                                         |                                                                  | Thinking about brother's phone call from a couple of months ago |                      |    |
| 3              |             |   |        |                        |                                 | Feeling in head                         |                                                                  |                                                                 | Thinking about a dog |    |
| 8              |             |   |        | Buzzing in head        |                                 |                                         |                                                                  |                                                                 |                      |    |
| 9              |             |   |        | Thinking about cottage | Thinking about cottage and lake | Thinking about cottage, lake, and water | Thinking about sitting on the porch by the cottage near the lake | Warmth                                                          | Warmth               |    |
| 10             |             |   |        |                        |                                 |                                         |                                                                  |                                                                 |                      |    |
| 11             |             |   |        |                        |                                 |                                         |                                                                  |                                                                 |                      |    |

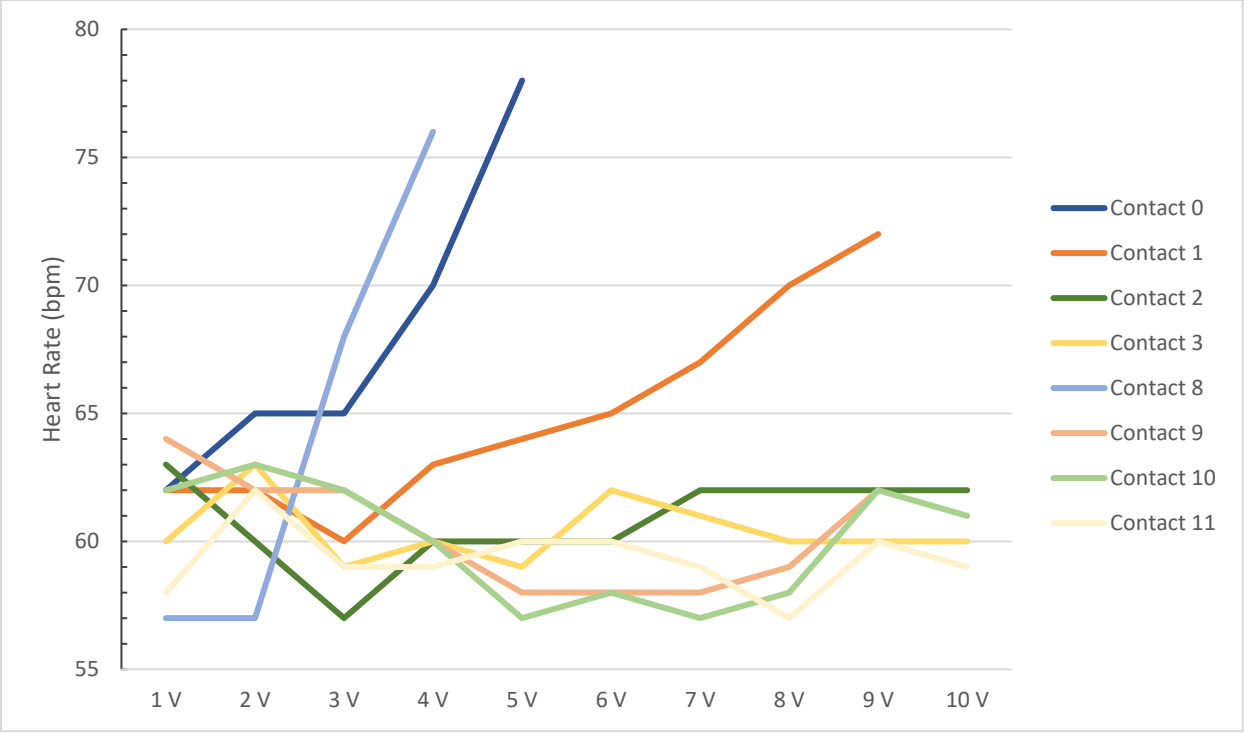

# Patient 3

| Contact number | Voltage (V) |                     |                             |                   |                                                  |         |   |                               |                      |    |
|----------------|-------------|---------------------|-----------------------------|-------------------|--------------------------------------------------|---------|---|-------------------------------|----------------------|----|
|                | 1           | 2                   | 3                           | 4                 | 5                                                | 6       | 7 | 8                             | 9                    | 10 |
| 0              |             | Tingling in fingers | Nausea                      |                   |                                                  |         |   |                               |                      |    |
| 1              |             |                     | Thirst<br>Throat discomfort | Throat discomfort | Throat discomfort<br>Nausea<br>Anxiety<br>Warmth |         |   |                               |                      |    |
| 2              |             |                     |                             | Warmth            | Warmth in head                                   | Anxiety |   |                               |                      |    |
| 3              |             |                     |                             |                   |                                                  |         |   | Discomfort abdomen and throat | Discomfort<br>Nausea |    |
| 8              |             |                     | Nausea                      | Discomfort        |                                                  |         |   |                               |                      |    |
| 9              |             |                     |                             | Discomfort        | Discomfort                                       |         |   |                               |                      |    |
| 10             |             |                     |                             | Melancholy        | Warmth                                           |         |   |                               |                      |    |
| 11             |             |                     |                             |                   |                                                  |         |   |                               |                      |    |

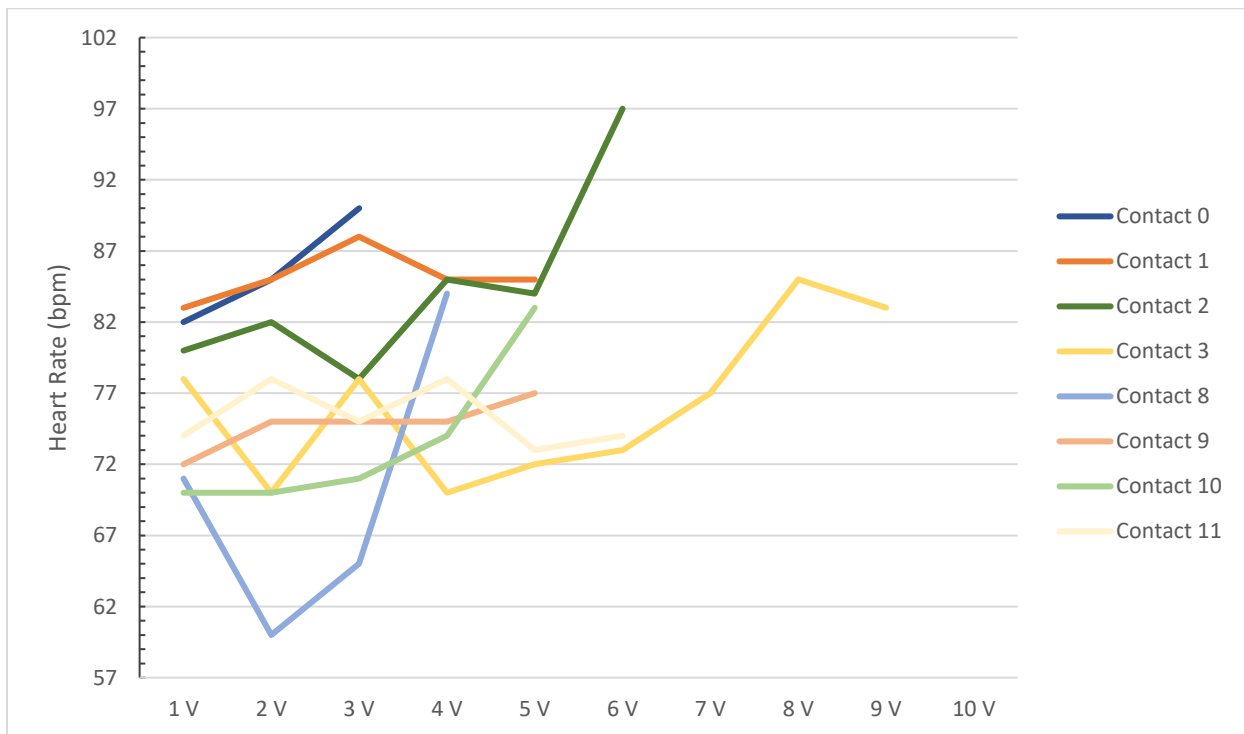

# Patient 4

| Contact number | Voltage (V) |   |      |      |                              |          |                                         |           |                             |        |
|----------------|-------------|---|------|------|------------------------------|----------|-----------------------------------------|-----------|-----------------------------|--------|
|                | 1           | 2 | 3    | 4    | 5                            | 6        | 7                                       | 8         | 9                           | 10     |
| 0              |             |   | Cool | Cool | Warmth                       | Warmth   | Warmth                                  |           |                             |        |
| 1              |             |   |      |      |                              |          | Hot flash                               | Hot flash |                             | Warmth |
| 2              |             |   |      |      | Tingling in leg<br>Autonomic |          | Warmth in chest and neck                |           |                             |        |
| 3              |             |   |      |      |                              |          |                                         |           |                             |        |
| 8              |             |   |      |      |                              |          | Tingling tips of left hand<br>Autonomic |           |                             |        |
| 9              |             |   |      |      | Tingling in legs             |          | Cool                                    |           |                             |        |
| 10             |             |   |      |      |                              |          | Tingling in legs                        |           |                             |        |
| 11             |             |   |      |      | Tingling in hands            | Tingling |                                         |           | Tingling in right leg/thigh |        |

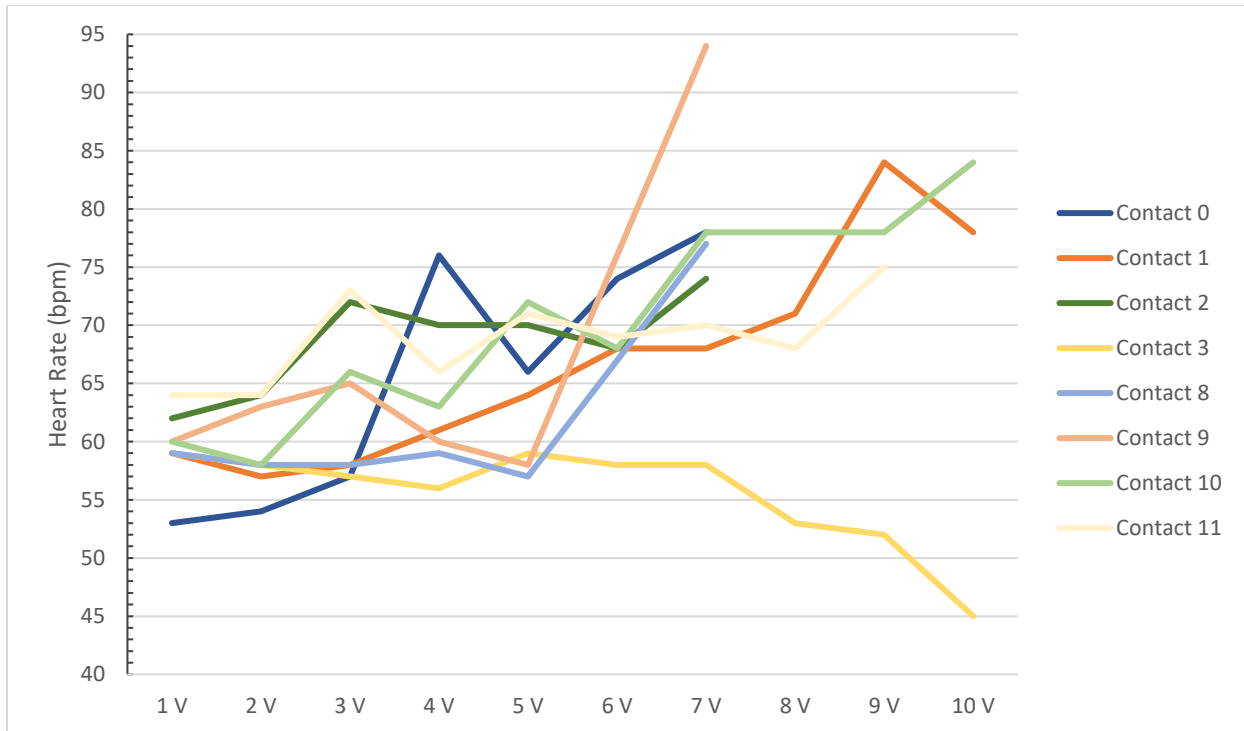



# Patient 6

| Contact number | Voltage (V) |      |          |            |                   |                 |                                         |            |   |    |
|----------------|-------------|------|----------|------------|-------------------|-----------------|-----------------------------------------|------------|---|----|
|                | 1           | 2    | 3        | 4          | 5                 | 6               | 7                                       | 8          | 9 | 10 |
| 0              |             |      | Headache |            | Warmth            |                 |                                         |            |   |    |
| 1              |             |      |          |            | Sweating of palms | Warmth Flushing |                                         |            |   |    |
| 2              |             | Cool |          |            |                   |                 |                                         |            |   |    |
| 3              |             |      |          |            |                   |                 |                                         | Frustrated |   |    |
| 8              |             |      |          | Frustrated |                   |                 |                                         |            |   |    |
| 9              |             |      |          |            |                   | Autonomic       |                                         |            |   |    |
| 10             |             |      |          |            |                   |                 | Sweating of hands<br>Flushing<br>Warmth |            |   |    |
| 11             |             |      |          |            |                   |                 |                                         |            |   |    |

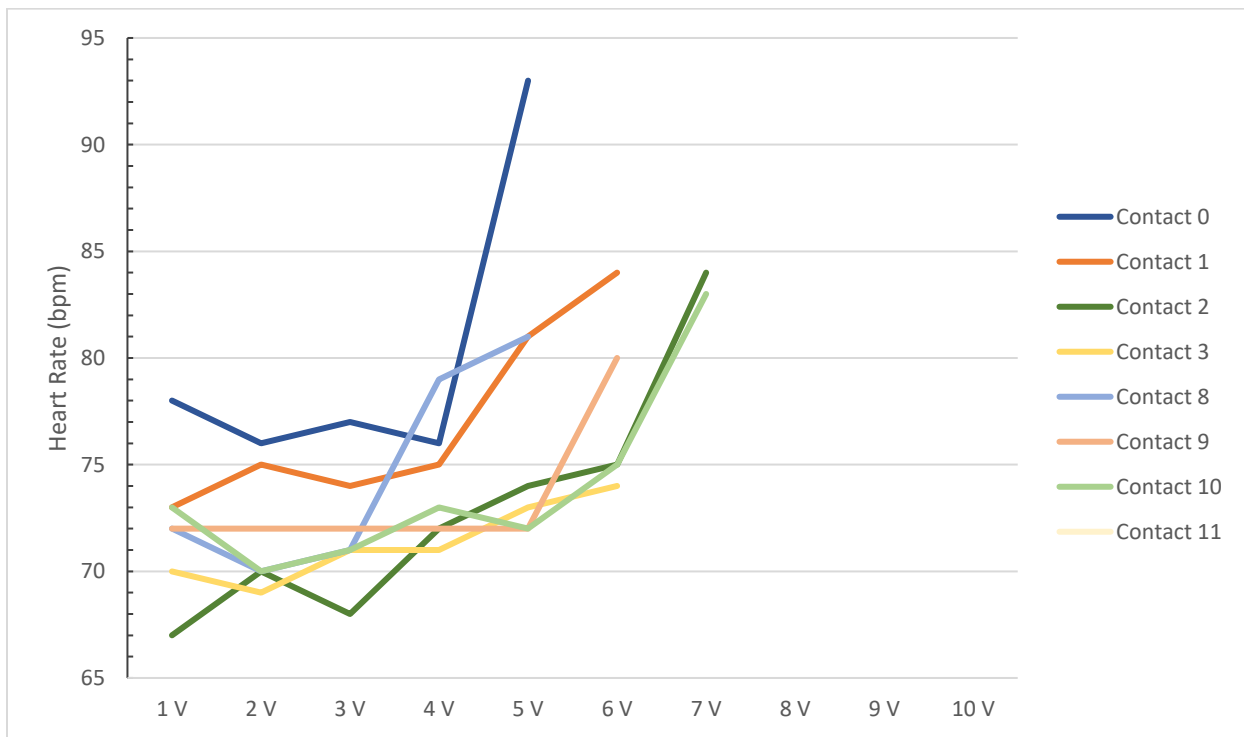

# Patient 7

| Contact number | Voltage (V) |   |   |        |                    |                                                  |                    |         |        |    |
|----------------|-------------|---|---|--------|--------------------|--------------------------------------------------|--------------------|---------|--------|----|
|                | 1           | 2 | 3 | 4      | 5                  | 6                                                | 7                  | 8       | 9      | 10 |
| 0              |             |   |   |        | Warmth             | Warmth<br>Feeling<br>in arms                     |                    |         |        |    |
| 1              |             |   |   |        | Flushing<br>Warmth | Warmth                                           |                    |         |        |    |
| 2              |             |   |   |        |                    | Flushing<br>Warmth<br>Sweating<br>of<br>forehead | Flushing<br>Warmth |         |        |    |
| 3              |             |   |   |        |                    |                                                  |                    | Thirsty | Warmth |    |
| 8              |             |   |   |        | Warmth             |                                                  |                    |         |        |    |
| 9              |             |   |   | Warmth | Flushing<br>Warmth |                                                  |                    |         |        |    |
| 10             |             |   |   |        |                    |                                                  | Warmth             |         |        |    |
| 11             |             |   |   |        |                    |                                                  | Warmth<br>Flushing |         |        |    |

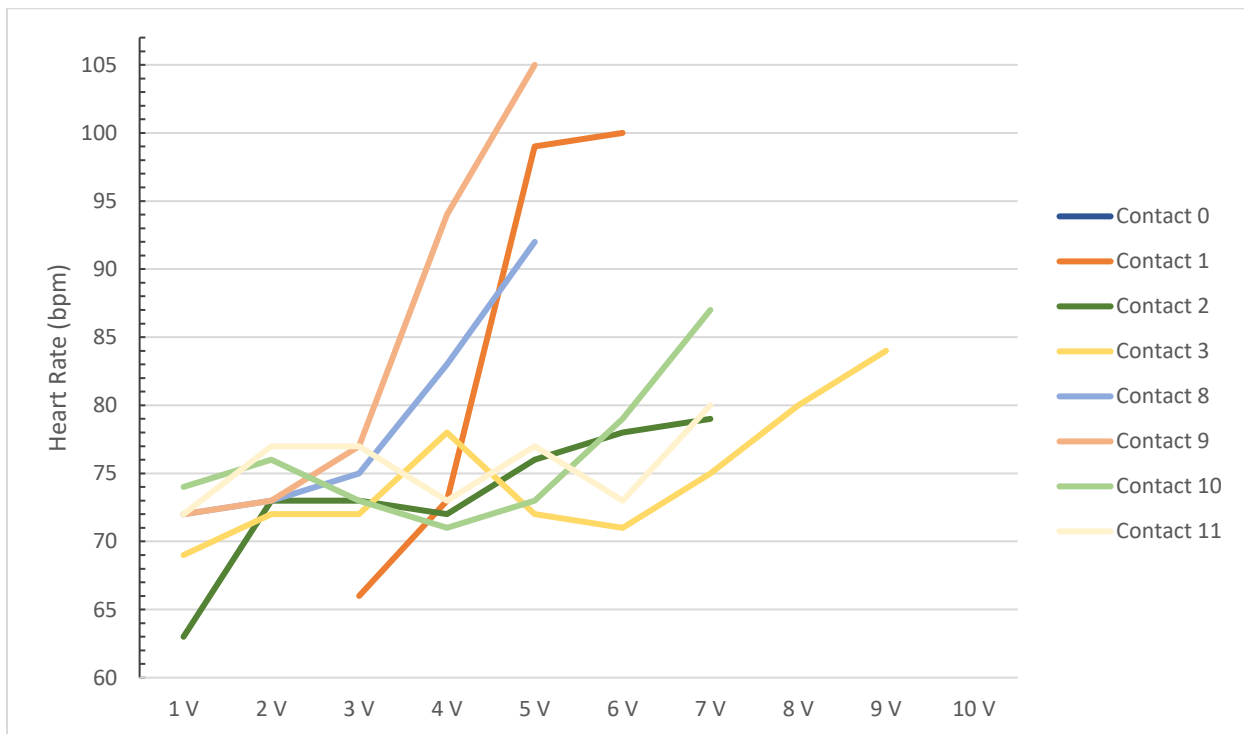

# Patient 8

| Contact number | Voltage (V) |   |                            |                    |                            |                                                         |                                                        |                                                                |   |                            |
|----------------|-------------|---|----------------------------|--------------------|----------------------------|---------------------------------------------------------|--------------------------------------------------------|----------------------------------------------------------------|---|----------------------------|
|                | 1           | 2 | 3                          | 4                  | 5                          | 6                                                       | 7                                                      | 8                                                              | 9 | 10                         |
| 0              |             |   |                            | Warmth             | Flushing of face<br>Warmth | Warmth                                                  |                                                        |                                                                |   |                            |
| 1              |             |   |                            | Feeling of wound   | Warmth                     | Warmth                                                  |                                                        |                                                                |   |                            |
| 2              |             |   |                            |                    |                            |                                                         | Warmth<br>Thinking about living in Scotland as a child | Warmth                                                         |   |                            |
| 3              |             |   | Tingling at the wound site |                    |                            | Thinking of time in Scotland and about a merry-go-round | Memory decreased                                       | Thinking of playing with brother on monkey bars and stretching |   | Tingling in the IPG pocket |
| 8              |             |   |                            | Warmth             | Warmth                     |                                                         |                                                        |                                                                |   |                            |
| 9              |             |   |                            | Warmth<br>Flushing | Warmth                     |                                                         |                                                        |                                                                |   |                            |
| 10             |             |   |                            |                    | Warmth<br>Cool             | Flushing<br>Hot flash                                   |                                                        |                                                                |   |                            |
| 11             |             |   |                            |                    | Warmth                     | Warmth                                                  |                                                        |                                                                |   |                            |

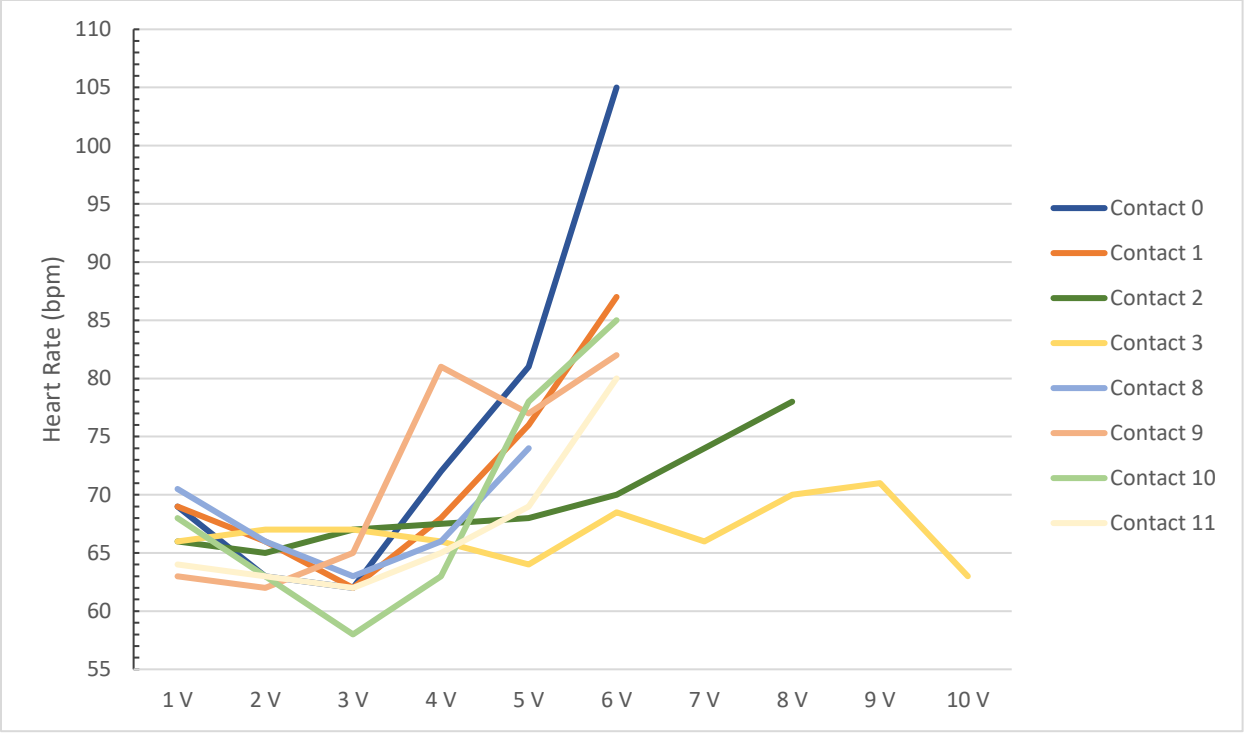

# Patient 9

| Contact number | Voltage (V) |   |                                |                                                 |                                             |                             |                                               |                     |   |        |
|----------------|-------------|---|--------------------------------|-------------------------------------------------|---------------------------------------------|-----------------------------|-----------------------------------------------|---------------------|---|--------|
|                | 1           | 2 | 3                              | 4                                               | 5                                           | 6                           | 7                                             | 8                   | 9 | 10     |
| 0              |             |   | Warmth<br>Sweating<br>of palms | Burping<br>Warmth<br>Sweating                   |                                             |                             |                                               |                     |   |        |
| 1              |             |   |                                |                                                 | Tingling of<br>fingers<br>Jerks<br>Sweating | Cool<br>Burping             |                                               |                     |   |        |
| 2              |             |   |                                | Telling<br>story<br>about<br>ore job in<br>1959 | Flushing<br>Cool<br>Sweating                | Clammy<br>Flushing          | Sweating<br>Flushing                          | Sweating<br>visibly |   |        |
| 3              |             |   |                                | Telling<br>work<br>stories                      | Warmth                                      |                             |                                               | Warmth              |   |        |
| 8              |             |   |                                |                                                 | Warmth                                      | Warmth<br>Clammy<br>Burping | Felt<br>weird<br>Kicked-in<br>to<br>overdrive |                     |   |        |
| 9              |             |   | Cool<br>fingers                | Nausea                                          | Uncomfortable<br>above groin<br>Burping     | Burping                     |                                               |                     |   |        |
| 10             |             |   |                                |                                                 | Flushing<br>Warmth<br>Clammy                | Warmth<br>Clammy            | Warmth<br>Sweating<br>Flushing                |                     |   |        |
| 11             |             |   |                                |                                                 |                                             |                             | Warmth<br>Cool<br>fingers                     | Warmth              |   | Warmth |

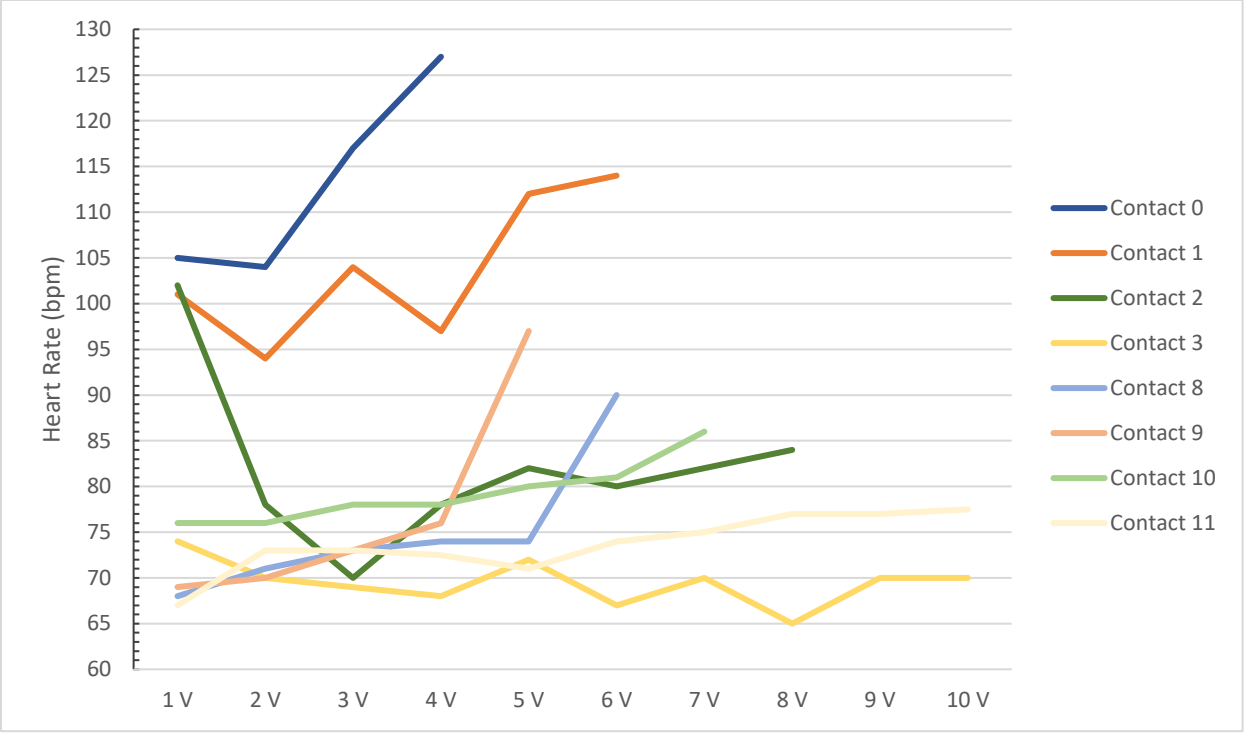

# Patient 10

| Contact number | Voltage (V) |                                |                      |                    |                            |                                             |                 |   |   |                    |
|----------------|-------------|--------------------------------|----------------------|--------------------|----------------------------|---------------------------------------------|-----------------|---|---|--------------------|
|                | 1           | 2                              | 3                    | 4                  | 5                          | 6                                           | 7               | 8 | 9 | 10                 |
| 0              |             |                                |                      |                    | Sweating of palms          | Flushing of hands<br>Butterflies in stomach |                 |   |   |                    |
| 1              |             | Anxiety                        |                      |                    | Anxiety<br>Cool<br>Burping |                                             |                 |   |   |                    |
| 2              |             |                                |                      |                    | Anxiety                    | Cool                                        | Cool<br>Anxiety |   |   |                    |
| 3              |             |                                |                      | Cool               | Feeling full               |                                             |                 |   |   | Patient very tired |
| 8              |             |                                | Cool around the neck | Saw light mist     | Cool<br>Stomach growling   |                                             |                 |   |   |                    |
| 9              |             | Cool around the neck and hands |                      | Flushing<br>Warmth |                            |                                             |                 |   |   |                    |
| 10             |             | Stomach growling               |                      |                    | Confused                   | Confused                                    |                 |   |   |                    |
| 11             | Confused    |                                |                      |                    |                            |                                             |                 |   |   |                    |

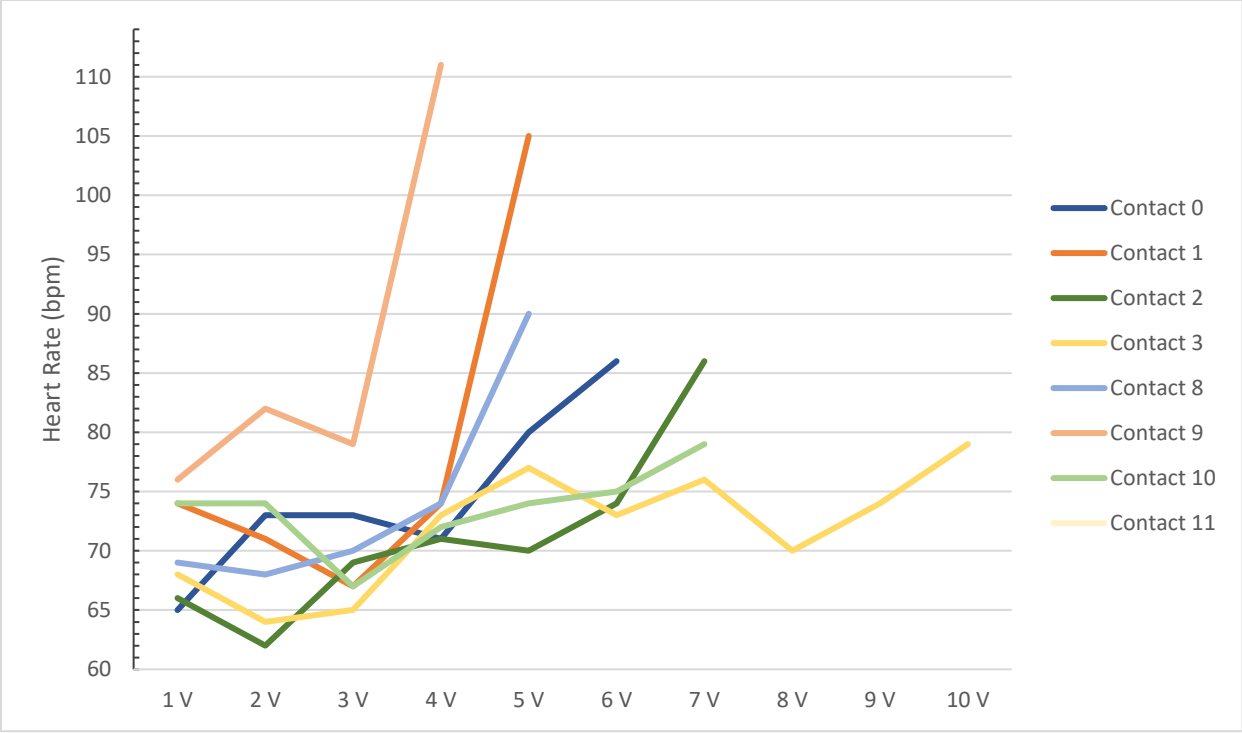



# Patient 11

| Contact number | Voltage (V) |         |          |                             |                    |                                                |                      |   |   |    |
|----------------|-------------|---------|----------|-----------------------------|--------------------|------------------------------------------------|----------------------|---|---|----|
|                | 1           | 2       | 3        | 4                           | 5                  | 6                                              | 7                    | 8 | 9 | 10 |
| 0              |             |         | Burping  | Nausea<br>Slurred<br>speech |                    |                                                |                      |   |   |    |
| 1              |             |         |          | Cool                        |                    | Thirsty                                        | Warmth<br>Burping    |   |   |    |
| 2              |             |         |          | Burping                     |                    | Thinking<br>about what<br>grandson is<br>doing | Burping<br>Sweating  |   |   |    |
| 3              |             | Burping | Sweating |                             | Cool               |                                                |                      |   |   |    |
| 8              |             | Burping |          |                             |                    | Phosphenes                                     |                      |   |   |    |
| 9              |             |         |          |                             |                    | Warmth                                         |                      |   |   |    |
| 10             |             |         |          | Cool                        | Flushing<br>Warmth |                                                | Flushing<br>Sweating |   |   |    |
| 11             | Burping     |         |          |                             |                    |                                                |                      |   |   |    |

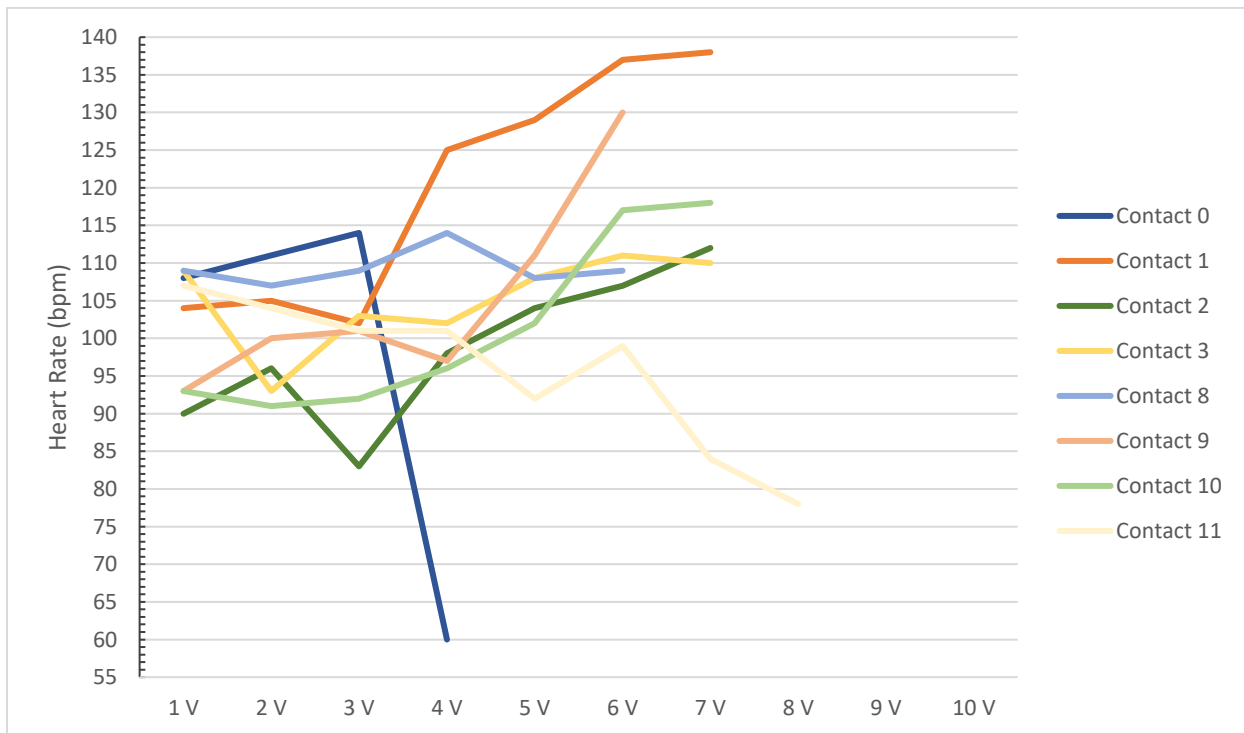

# Patient 12

| Contact number | Voltage (V) |   |                                            |                                                        |                                                       |                         |                                 |   |   |    |
|----------------|-------------|---|--------------------------------------------|--------------------------------------------------------|-------------------------------------------------------|-------------------------|---------------------------------|---|---|----|
|                | 1           | 2 | 3                                          | 4                                                      | 5                                                     | 6                       | 7                               | 8 | 9 | 10 |
| 0              |             |   |                                            |                                                        | Tachypnea<br>Burping<br>Sweating of palms<br>Confused |                         |                                 |   |   |    |
| 1              |             |   |                                            | Warmth in face, arms and chest<br>Tachypnea<br>Anxiety |                                                       |                         |                                 |   |   |    |
| 2              |             |   | Flushing                                   |                                                        | Warmth<br>Tachypnea                                   |                         | Confused<br>Sweating of palms   |   |   |    |
| 3              |             |   |                                            |                                                        |                                                       |                         | Warmth in neck, chest, and arms |   |   |    |
| 8              |             |   | Tachypnea<br>Anxiety<br>Warmth<br>Confused |                                                        |                                                       |                         |                                 |   |   |    |
| 9              |             |   |                                            |                                                        |                                                       | Warmth<br>Uncomfortable |                                 |   |   |    |
| 10             |             |   |                                            |                                                        | Warmth                                                | Warmth                  | Sweating<br>Confused            |   |   |    |
| 11             |             |   |                                            |                                                        |                                                       | Confused<br>Tired       |                                 |   |   |    |

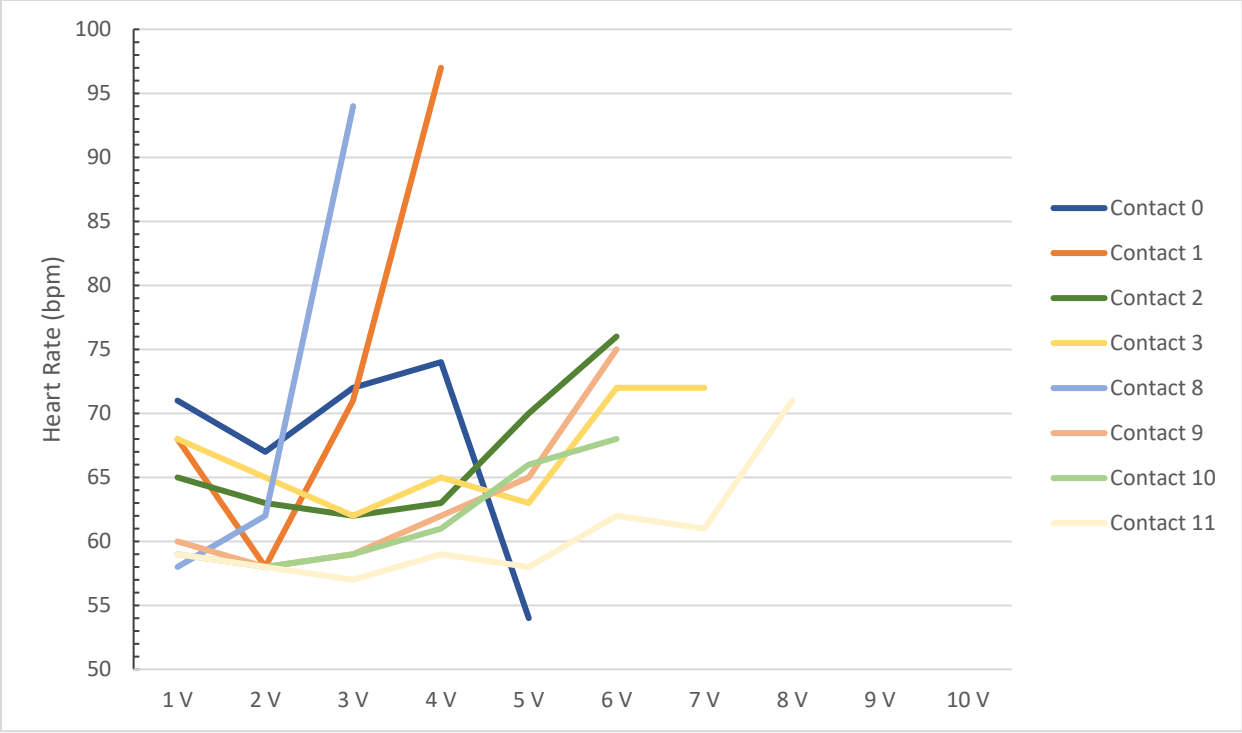

Patient 13

| Contact number | Voltage (V) |   |   |   |                                            |                                                                |                    |   |   |    |
|----------------|-------------|---|---|---|--------------------------------------------|----------------------------------------------------------------|--------------------|---|---|----|
|                | 1           | 2 | 3 | 4 | 5                                          | 6                                                              | 7                  | 8 | 9 | 10 |
| 0              |             |   |   |   | Flushing                                   | Flushing                                                       |                    |   |   |    |
| 1              |             |   |   |   |                                            | Thoughts of summer spent in Harrisburg, PA                     |                    |   |   |    |
| 2              |             |   |   |   | Memories of summers spent in PA as a child | Memories of summers spent in PA as a child – reported as vivid | Continued memories |   |   |    |
| 3              |             |   |   |   |                                            |                                                                |                    |   |   |    |
| 8              |             |   |   |   |                                            | Warmth                                                         |                    |   |   |    |
| 9              |             |   |   |   | Flushing<br>Warmth                         |                                                                |                    |   |   |    |
| 10             |             |   |   |   | Running thoughts                           | Memories of the coconut grove and house in Miami, FL           |                    |   |   |    |
| 11             |             |   |   |   |                                            |                                                                |                    |   |   |    |

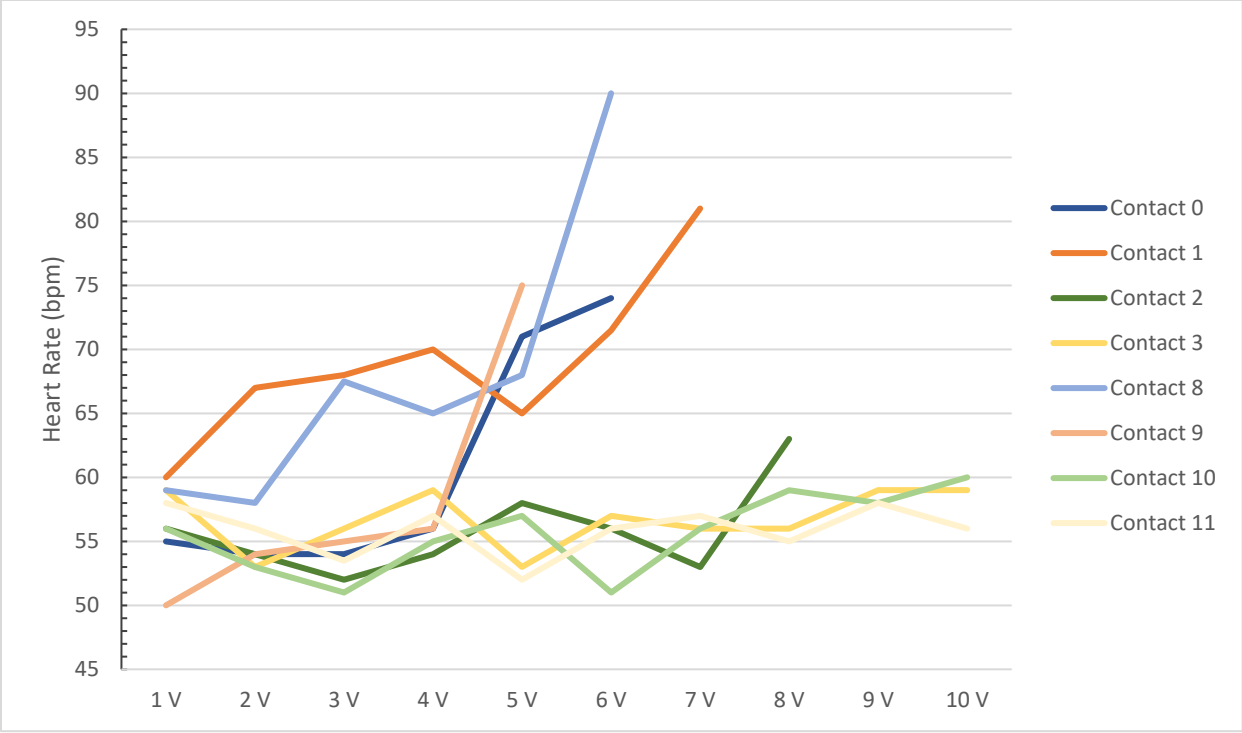

# Patient 14

| Contact number | Voltage (V) |          |                                                    |        |                    |   |                                                     |          |       |    |
|----------------|-------------|----------|----------------------------------------------------|--------|--------------------|---|-----------------------------------------------------|----------|-------|----|
|                | 1           | 2        | 3                                                  | 4      | 5                  | 6 | 7                                                   | 8        | 9     | 10 |
| 0              |             |          |                                                    |        | Flushing           |   |                                                     |          |       |    |
| 1              |             | Flushing |                                                    | Hunger |                    |   | Cool in fingers<br>Hunger                           | Flushing |       |    |
| 2              |             |          |                                                    |        |                    |   | College memories such as walking through the campus |          |       |    |
| 3              |             |          |                                                    |        |                    |   |                                                     |          |       |    |
| 8              |             |          |                                                    |        | Flushing<br>Warmth |   |                                                     |          |       |    |
| 9              |             |          |                                                    |        | Hot flashes        |   |                                                     |          |       |    |
| 10             |             |          | Recounts story about sister when they were younger |        |                    |   |                                                     |          |       |    |
| 11             |             |          |                                                    |        |                    |   |                                                     |          | Tired |    |

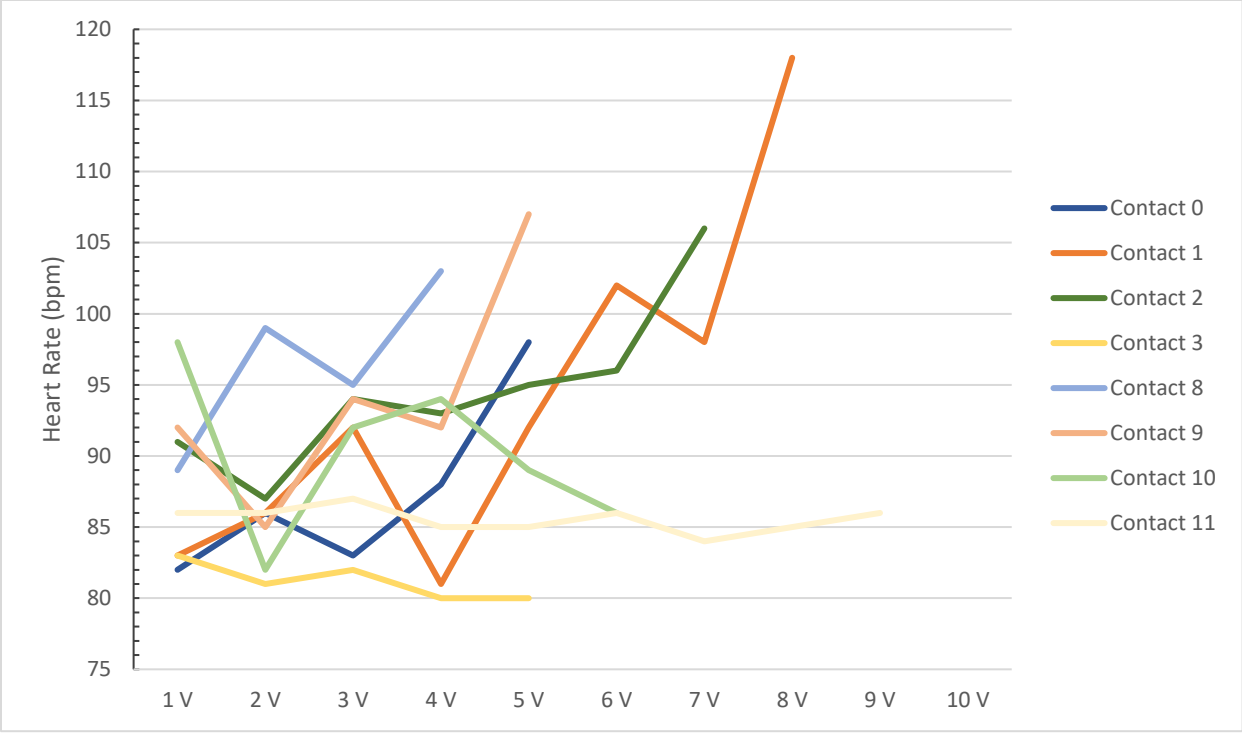

# Patient 15

| Contact number | Voltage (V) |   |                                                                                        |                                            |                   |                                  |                                                                                                   |                                                                                                                                |                   |                               |
|----------------|-------------|---|----------------------------------------------------------------------------------------|--------------------------------------------|-------------------|----------------------------------|---------------------------------------------------------------------------------------------------|--------------------------------------------------------------------------------------------------------------------------------|-------------------|-------------------------------|
|                | 1           | 2 | 3                                                                                      | 4                                          | 5                 | 6                                | 7                                                                                                 | 8                                                                                                                              | 9                 | 10                            |
| 0              |             |   |                                                                                        | Tingling in arms and hands<br>Warmth       | Warmth            |                                  |                                                                                                   |                                                                                                                                |                   |                               |
| 1              |             |   |                                                                                        | Warmth                                     | Sweating          | Sweating<br>Warmth               |                                                                                                   |                                                                                                                                |                   |                               |
| 2              |             |   |                                                                                        |                                            |                   |                                  | Memory of helping a guy find something on his property                                            | Memory more detailed now remembering the guy's son                                                                             | Continued thought | More details, Halloween night |
| 3              |             |   |                                                                                        |                                            |                   |                                  |                                                                                                   |                                                                                                                                |                   | Satiety                       |
| 8              |             |   |                                                                                        |                                            | Warmth            | Warmth<br>Tired                  | Tired<br>Slurred speech                                                                           |                                                                                                                                |                   |                               |
| 9              |             |   | Thought about someone from 23 years ago who owed him money and bowled on the same team | Thoughts about a lineman from 26 years ago |                   | Warmth                           | Warmth                                                                                            |                                                                                                                                |                   |                               |
| 10             |             |   |                                                                                        |                                            | Thoughts floating | Thoughts floating<br>Halo effect | Thoughts of standing on the front porch of the first house he bought and a taste of specific food | More details, satiety from eating sardines and mustard sandwich (previously noted taste), now recalls it occurred 23 years ago |                   |                               |



|    |  |  |  |  |  |                 |                                 |                                                                                                                                            |  |
|----|--|--|--|--|--|-----------------|---------------------------------|--------------------------------------------------------------------------------------------------------------------------------------------|--|
|    |  |  |  |  |  | (can't specify) |                                 |                                                                                                                                            |  |
| 11 |  |  |  |  |  |                 | Thoughts ready to break through | Thought of hitting a kid named Jamie Ray in the face at the age of 5 years, vivid details and remembering hopping through the neighborhood |  |

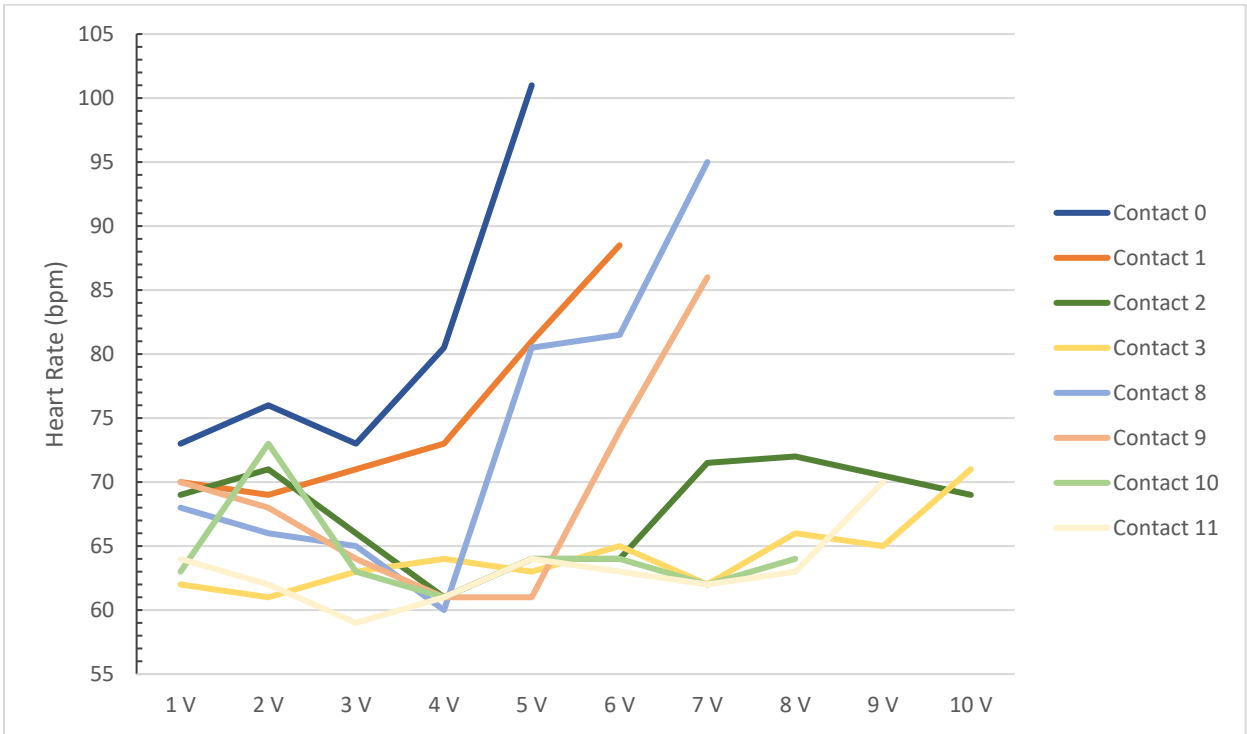

# Patient 16

| Contact number | Voltage (V) |                              |         |                                           |                 |                           |        |                                     |   |                            |
|----------------|-------------|------------------------------|---------|-------------------------------------------|-----------------|---------------------------|--------|-------------------------------------|---|----------------------------|
|                | 1           | 2                            | 3       | 4                                         | 5               | 6                         | 7      | 8                                   | 9 | 10                         |
| 0              |             |                              |         | Warmth                                    | Warmth          |                           |        |                                     |   |                            |
| 1              |             |                              |         | Warmth of incision                        | Warmth Sweating | Warmth                    |        |                                     |   |                            |
| 2              |             |                              |         | Warmth of incision                        |                 | Tingling at IPG pocket    |        | Tingling of the head and IPG pocket |   | Tingling of the IPG pocket |
| 3              |             |                              |         |                                           |                 |                           |        |                                     |   |                            |
| 8              |             |                              | Sadness | Flushing<br>Warmth<br>Shortness of breath |                 |                           |        |                                     |   |                            |
| 9              |             | Tingling of the right temple |         |                                           | Hot flash       | Flushing                  | Warmth |                                     |   |                            |
| 10             |             |                              |         |                                           | Flushing        | Nausea<br>Sweating        |        |                                     |   |                            |
| 11             |             |                              |         | Wheels turning in head                    |                 | Tingling of left forehead |        |                                     |   |                            |

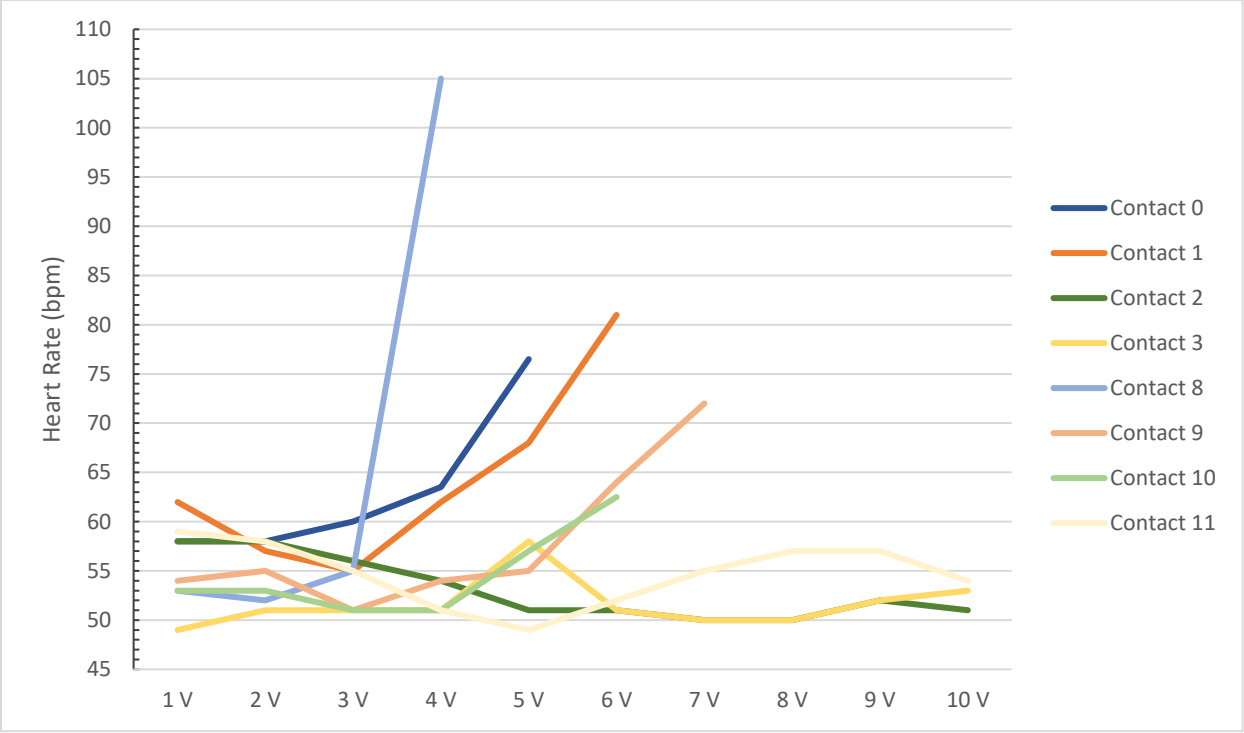

# Patient 17

|                | Voltage (V) |   |   |        |                        |        |          |                                                 |        |                    |
|----------------|-------------|---|---|--------|------------------------|--------|----------|-------------------------------------------------|--------|--------------------|
| Contact number | 1           | 2 | 3 | 4      | 5                      | 6      | 7        | 8                                               | 9      | 10                 |
| 0              |             |   |   | Warmth | Warmth<br>Palpitations |        |          |                                                 |        |                    |
| 1              |             |   |   |        | Cool                   | Warmth | Sweating |                                                 |        |                    |
| 2              |             |   |   |        |                        |        |          | Talks<br>about<br>poodle<br>at home<br>Flushing | Warmth | Warmth<br>Flushing |
| 3              |             |   |   |        |                        |        |          |                                                 |        |                    |
| 8              |             |   |   | Warmth |                        |        |          |                                                 |        |                    |
| 9              |             |   |   |        | Warmth                 |        |          |                                                 |        |                    |
| 10             |             |   |   |        |                        |        |          |                                                 |        |                    |
| 11             |             |   |   |        |                        |        |          |                                                 |        |                    |

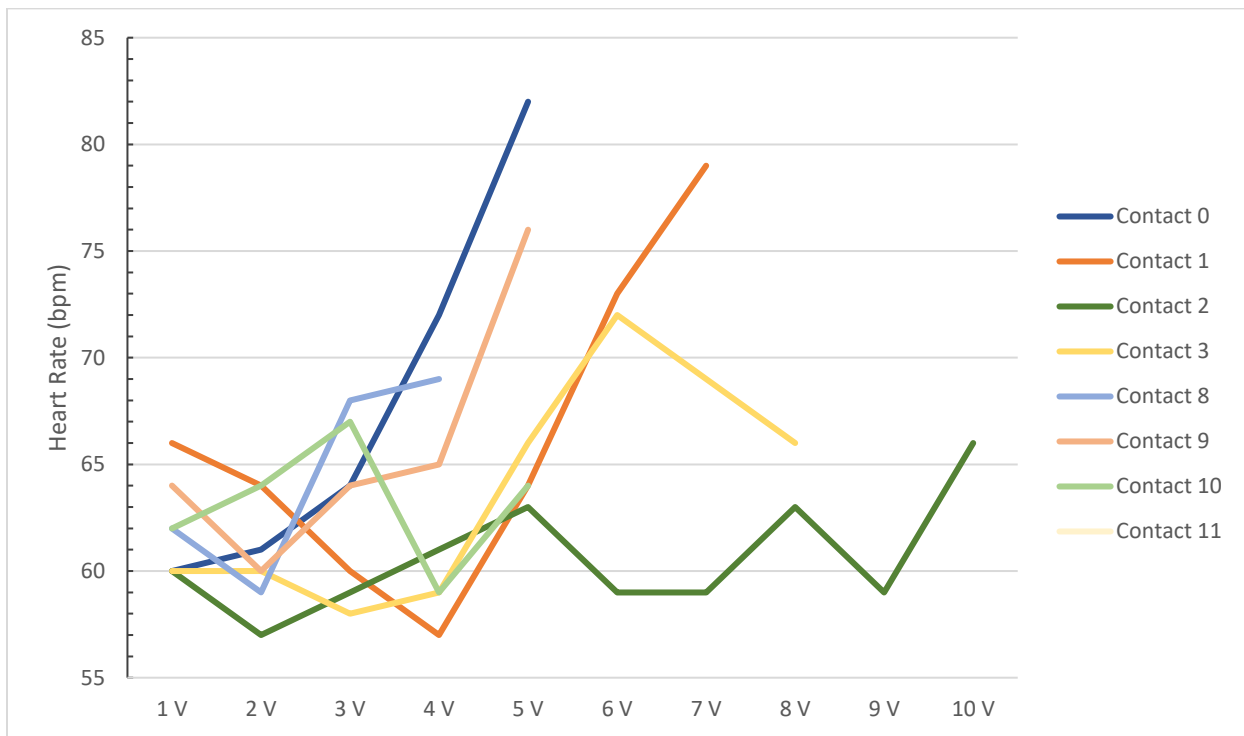

# Patient 18

|                | Voltage (V) |   |   |        |        |        |        |   |   |    |
|----------------|-------------|---|---|--------|--------|--------|--------|---|---|----|
| Contact number | 1           | 2 | 3 | 4      | 5      | 6      | 7      | 8 | 9 | 10 |
| 0              |             |   |   |        | Warmth |        |        |   |   |    |
| 1              |             |   |   | Warmth | Warmth |        |        |   |   |    |
| 2              |             |   |   |        | Warmth | Warmth | Warmth |   |   |    |
| 3              |             |   |   |        |        |        | Warmth |   |   |    |
| 8              |             |   |   | Warmth | Warmth |        |        |   |   |    |
| 9              |             |   |   | Warmth |        |        |        |   |   |    |
| 10             |             |   |   |        | Warmth | Warmth |        |   |   |    |
| 11             |             |   |   |        |        |        | Warmth |   |   |    |

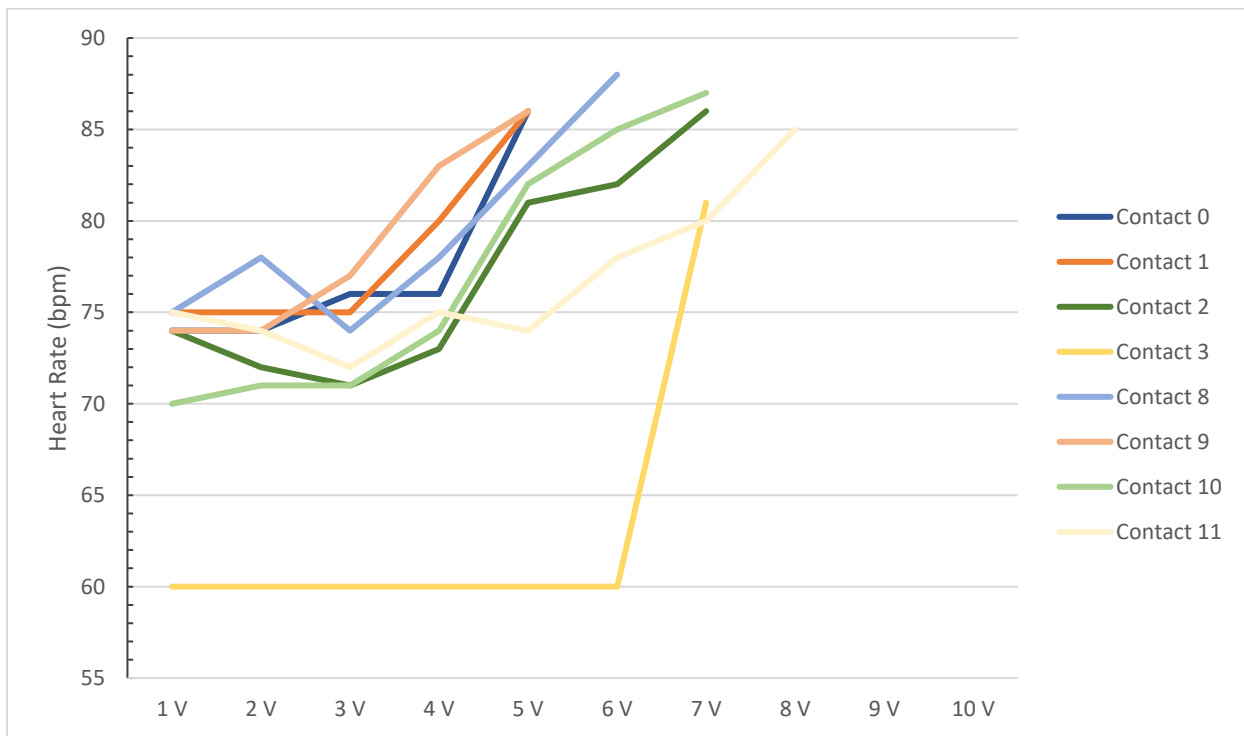

# Patient 19

| Contact number | Voltage (V) |        |                                      |                                                              |                                |                              |                    |   |   |    |
|----------------|-------------|--------|--------------------------------------|--------------------------------------------------------------|--------------------------------|------------------------------|--------------------|---|---|----|
|                | 1           | 2      | 3                                    | 4                                                            | 5                              | 6                            | 7                  | 8 | 9 | 10 |
| 0              |             |        |                                      | Warmth                                                       | Flushing<br>Warmth             |                              |                    |   |   |    |
| 1              |             |        | Warmth<br>Flushing                   |                                                              |                                |                              |                    |   |   |    |
| 2              |             |        |                                      | Warmth                                                       | Warmth                         | Thoughts<br>about<br>wedding | Flushing<br>Warmth |   |   |    |
| 3              |             |        | Thoughts<br>about<br>wedding         | Warmth                                                       | Warmth                         |                              |                    |   |   |    |
| 8              |             |        | Clammy<br>Tingling<br>at<br>incision | Warmth                                                       | Warmth                         |                              |                    |   |   |    |
| 9              |             | Clammy |                                      | Cool<br>Warmth                                               | Warmth<br>Tingling             |                              |                    |   |   |    |
| 10             |             |        | Memory<br>of father                  | Memory of<br>father<br>during<br>childhood                   | Tingling<br>in groin<br>Warmth | Warmth<br>Cool               | Flushing<br>Warmth |   |   |    |
| 11             |             |        | Warmth                               | Short term<br>recollections<br>(words<br>recently<br>tested) |                                | Warmth                       |                    |   |   |    |

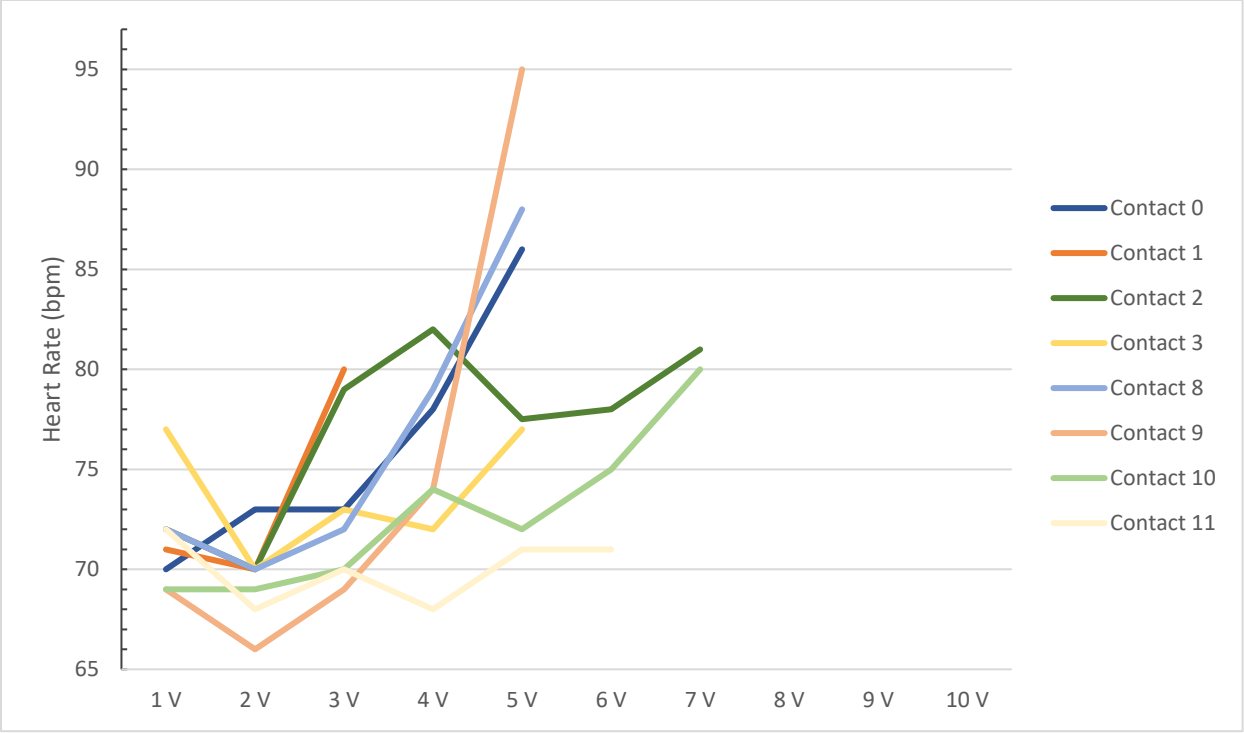

# Patient 20

| Contact number | Voltage (V) |   |   |                     |             |                  |                   |          |                 |    |
|----------------|-------------|---|---|---------------------|-------------|------------------|-------------------|----------|-----------------|----|
|                | 1           | 2 | 3 | 4                   | 5           | 6                | 7                 | 8        | 9               | 10 |
| 0              |             |   |   | Warmth              |             |                  |                   |          |                 |    |
| 1              |             |   |   | Tingling in the leg |             | Warmth           |                   |          |                 |    |
| 2              |             |   |   |                     |             | Flushing         | Flushing          | Flushing | Flushing Warmth |    |
| 3              |             |   |   |                     |             | Warmth           | Flushing Sweating |          |                 |    |
| 8              |             |   |   |                     | Warmth      | Warmth           |                   |          |                 |    |
| 9              |             |   |   | Anxiety             | Sun-downing | Hot flash Warmth | Warmth            |          |                 |    |
| 10             |             |   |   |                     |             |                  | Warmth            | Warmth   | Warmth          |    |
| 11             |             |   |   |                     |             |                  |                   |          |                 |    |

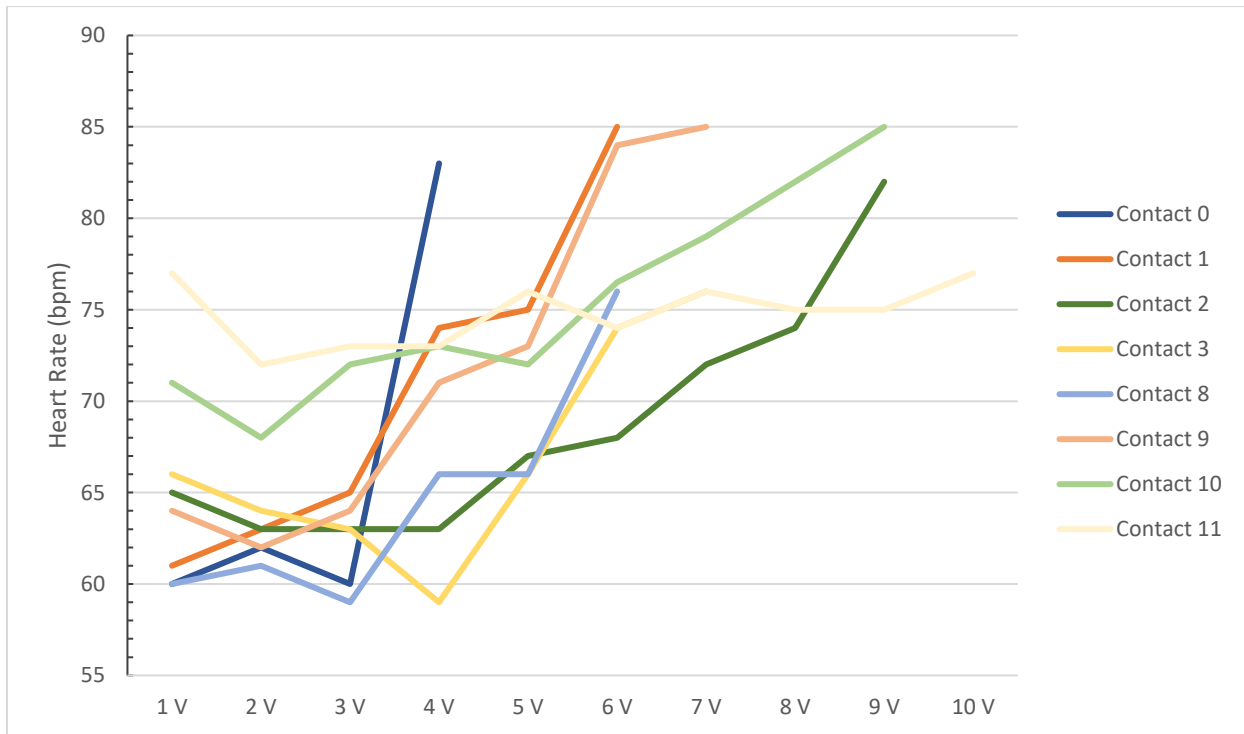



# Patient 21

| Contact number | Voltage (V)         |                         |        |                                  |   |      |                                                       |                      |   |    |
|----------------|---------------------|-------------------------|--------|----------------------------------|---|------|-------------------------------------------------------|----------------------|---|----|
|                | 1                   | 2                       | 3      | 4                                | 5 | 6    | 7                                                     | 8                    | 9 | 10 |
| 0              |                     |                         |        | Flushing<br>Sweating<br>Tingling |   |      |                                                       |                      |   |    |
| 1              |                     | Tingling<br>(carryover) | Warmth | Warmth                           |   |      |                                                       |                      |   |    |
| 2              |                     |                         | Cool   |                                  |   | Cool | Cool<br>Spoke<br>about<br>time as<br>MP in<br>Germany | Tingling<br>in chest |   |    |
| 3              | Cool<br>(carryover) | Trembling               |        |                                  |   |      |                                                       |                      |   |    |
| 8              |                     |                         |        |                                  |   |      |                                                       |                      |   |    |
| 9              |                     |                         |        |                                  |   |      |                                                       |                      |   |    |
| 10             |                     |                         |        |                                  |   |      |                                                       |                      |   |    |
| 11             |                     |                         |        |                                  |   |      |                                                       |                      |   |    |

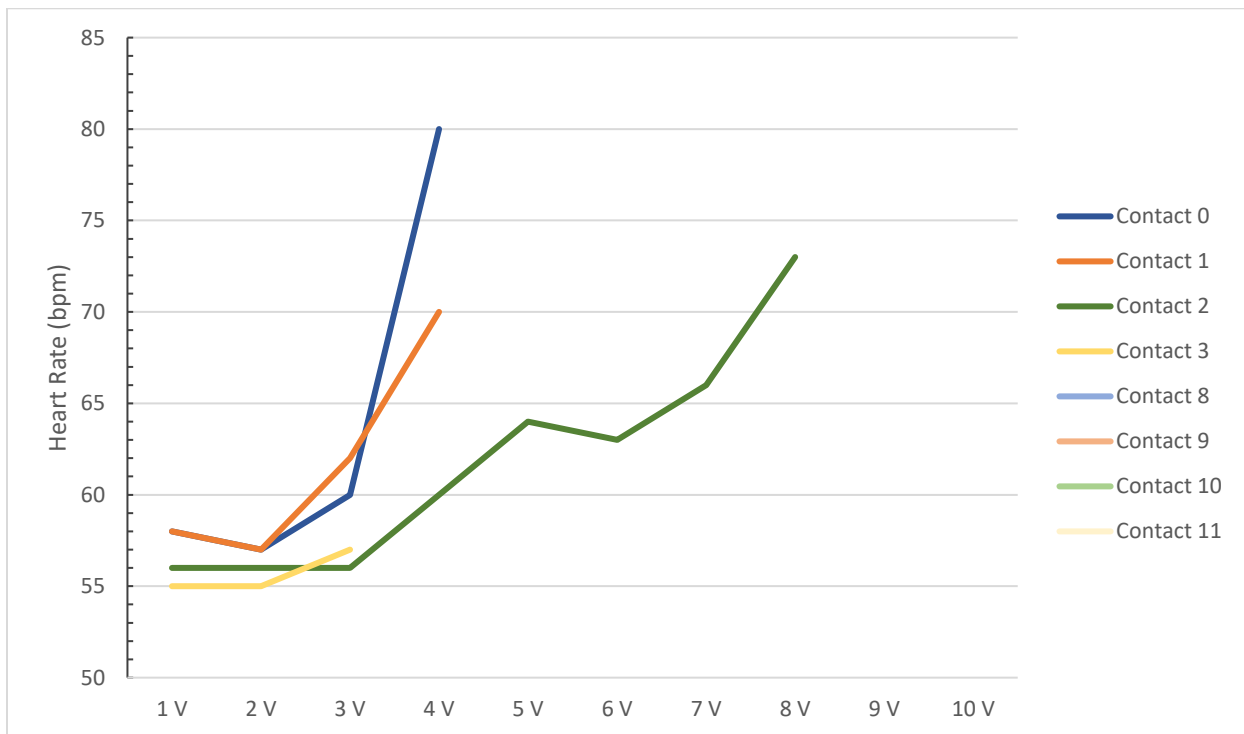

# Patient 22

| Contact number | Voltage (V)                   |   |                                        |                                    |                               |                                                    |                      |                                      |                                     |                                                                              |
|----------------|-------------------------------|---|----------------------------------------|------------------------------------|-------------------------------|----------------------------------------------------|----------------------|--------------------------------------|-------------------------------------|------------------------------------------------------------------------------|
|                | 1                             | 2 | 3                                      | 4                                  | 5                             | 6                                                  | 7                    | 8                                    | 9                                   | 10                                                                           |
| 0              |                               |   | Warmth                                 | Flushing<br>Warmth                 | Warmth                        | Warmth<br>Sweating<br>Twitching<br>of left<br>hand |                      |                                      |                                     |                                                                              |
| 1              |                               |   |                                        |                                    | Tingling<br>in face<br>Warmth | Warmth<br>Tremor<br>of the left<br>arm             |                      |                                      |                                     |                                                                              |
| 2              |                               |   |                                        |                                    | Warmth<br>Sweating            | Warmth                                             | Flushing<br>Sweating |                                      |                                     |                                                                              |
| 3              |                               |   | Pinprick<br>in right<br>ring<br>finger |                                    |                               |                                                    |                      |                                      | Sweating                            | Sweating                                                                     |
| 8              |                               |   | Feeling<br>hand<br>dropping            |                                    | Anxiety                       | Anxiety<br>Sweating                                | Anxiety<br>Warmth    |                                      |                                     |                                                                              |
| 9              |                               |   |                                        | Twitching<br>under left<br>arm pit |                               | Tingling<br>Vibration<br>under left<br>arm pit     | Sweating             | Anxiety<br>Warmth                    |                                     |                                                                              |
| 10             | Vibration<br>of right<br>hand |   |                                        |                                    | Cool                          | Flushing<br>Warmth                                 | Flushing<br>Warmth   |                                      |                                     |                                                                              |
| 11             |                               |   |                                        | Twitching<br>of the<br>right arm   |                               |                                                    |                      | Left<br>pectoral<br>muscle<br>twitch | Tingling<br>of the left<br>pectoral | Tightness<br>of the left<br>pectorals<br>Tingling<br>of the<br>right<br>hand |

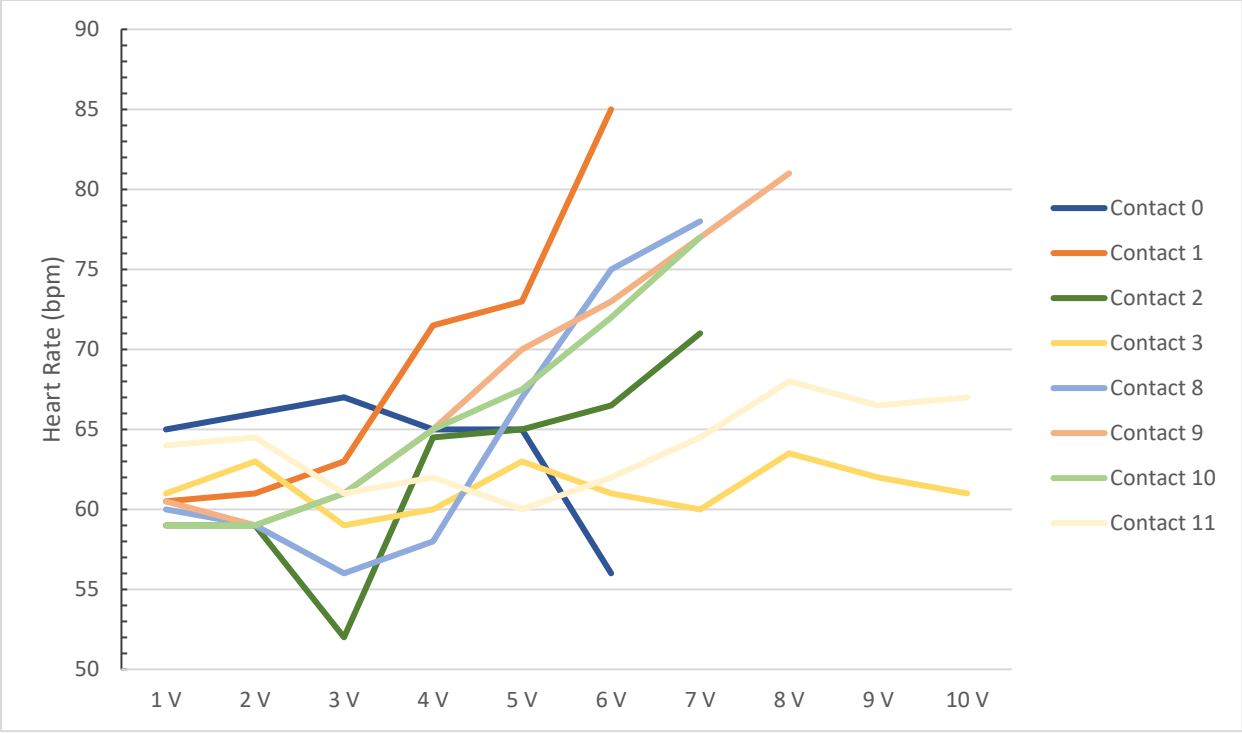

Patient 23

| Contact number | Voltage (V) |                                      |                                |                               |                                            |                    |                                                     |                                                             |   |    |
|----------------|-------------|--------------------------------------|--------------------------------|-------------------------------|--------------------------------------------|--------------------|-----------------------------------------------------|-------------------------------------------------------------|---|----|
|                | 1           | 2                                    | 3                              | 4                             | 5                                          | 6                  | 7                                                   | 8                                                           | 9 | 10 |
| 0              |             |                                      |                                |                               |                                            | Flushing<br>Warmth |                                                     |                                                             |   |    |
| 1              |             |                                      |                                |                               | Sweating                                   | Sweating           | Flushing<br>Sweating                                | Warmth<br>Sweating                                          |   |    |
| 2              |             | Rugby memories at Montserrat in 1969 | Memories about the Peace Corps |                               |                                            |                    | Marriage and joyful memories                        | Peace Corps memory from 1968 when he and his wife first met |   |    |
| 3              |             |                                      |                                |                               | Memories about golfing including the caddy |                    | Talking about how lucky and fantastic his family is |                                                             |   |    |
| 8              |             |                                      |                                |                               |                                            |                    | Flushing<br>Warmth                                  |                                                             |   |    |
| 9              |             |                                      |                                | Flushing                      | Warmth                                     |                    |                                                     |                                                             |   |    |
| 10             |             |                                      |                                |                               |                                            | Warmth<br>Flushing | Sweating<br>Warmth                                  |                                                             |   |    |
| 11             |             |                                      |                                | Looking forward to Notre Dame |                                            |                    |                                                     | Flushing                                                    |   |    |

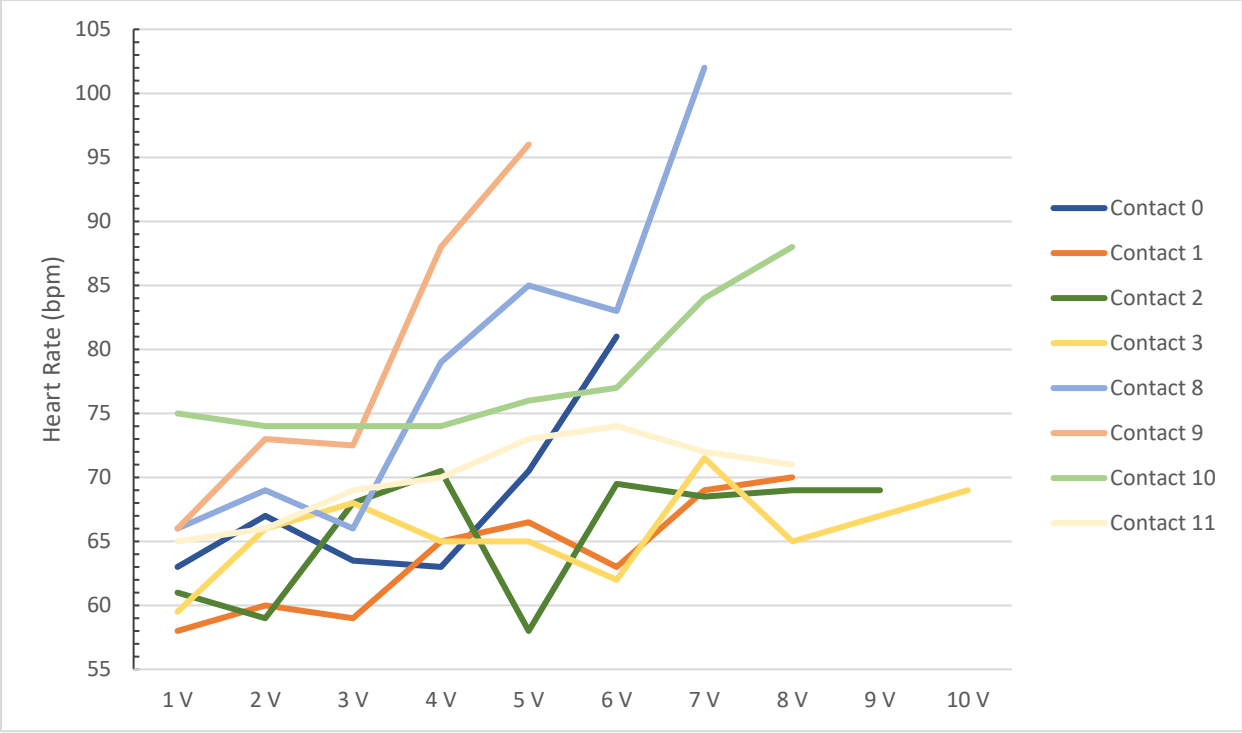

# Patient 24

| Contact number | Voltage (V)                     |                                            |                                                       |                                       |                                           |                                  |                                             |                                  |                              |                                                      |
|----------------|---------------------------------|--------------------------------------------|-------------------------------------------------------|---------------------------------------|-------------------------------------------|----------------------------------|---------------------------------------------|----------------------------------|------------------------------|------------------------------------------------------|
|                | 1                               | 2                                          | 3                                                     | 4                                     | 5                                         | 6                                | 7                                           | 8                                | 9                            | 10                                                   |
| 0              |                                 |                                            |                                                       |                                       | Feels his mouth                           | Sweating<br>Warmth<br>Tremor     |                                             |                                  |                              |                                                      |
| 1              | Tremor (carryover)              |                                            | Tremor of left hand                                   | Warmth                                | Anxiety<br>Warmth<br>Tingling in the feet |                                  |                                             |                                  |                              |                                                      |
| 2              |                                 |                                            | Warmth<br>Tingling                                    |                                       | Trembling in knees                        | Trembling in knees               | Telling story about grandmother (says name) |                                  |                              |                                                      |
| 3              |                                 | Telling story about a TN visit to his aunt | Telling story about grandmother's brother (says name) |                                       |                                           | Resumes talking about trip to TN | Talking about river trips in Vietnam        | Talking about service in Vietnam | Continues with Vietnam story | Memories continue (no change in detail or intensity) |
| 8              |                                 |                                            |                                                       | Warmth                                |                                           |                                  |                                             |                                  |                              |                                                      |
| 9              |                                 |                                            |                                                       | Talking about Navy stories in Vietnam |                                           |                                  |                                             |                                  |                              |                                                      |
| 10             | Continues talking about Vietnam |                                            |                                                       | Continues talking about Vietnam       |                                           | Warmth                           | Warmth<br>Sweating                          |                                  |                              |                                                      |
| 11             |                                 |                                            | Confusion                                             | Cool                                  |                                           |                                  |                                             |                                  |                              |                                                      |

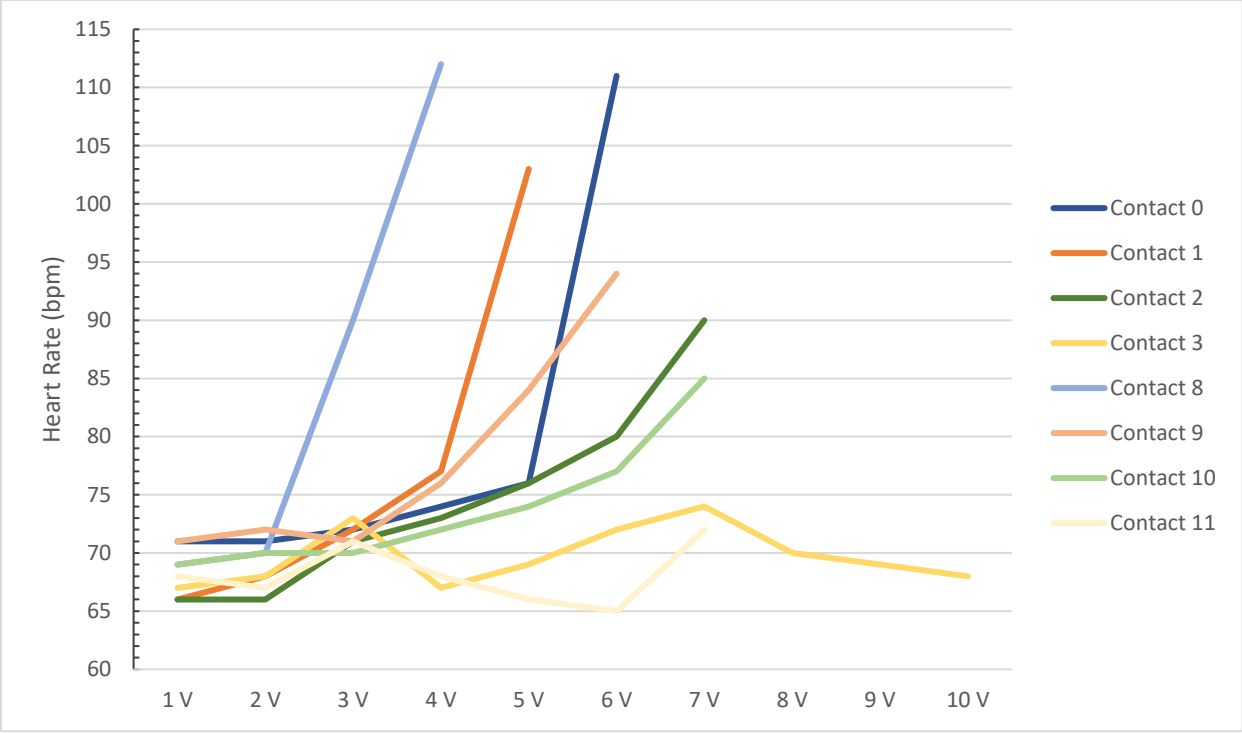

# Patient 25

| Contact number | Voltage (V) |                           |                      |                              |                               |                                      |                                               |                           |      |    |
|----------------|-------------|---------------------------|----------------------|------------------------------|-------------------------------|--------------------------------------|-----------------------------------------------|---------------------------|------|----|
|                | 1           | 2                         | 3                    | 4                            | 5                             | 6                                    | 7                                             | 8                         | 9    | 10 |
| 0              |             |                           |                      | Lightheaded                  | Cool<br>Shaky                 | Cool<br>Shaky                        |                                               |                           |      |    |
| 1              |             | Metallic<br>taste         | Shaky<br>(carryover) |                              | Cool<br>Shaky<br>(recurrence) | Sweating                             |                                               |                           |      |    |
| 2              |             | Shaky<br>jaw              |                      |                              |                               | Sweating                             | Talking<br>about<br>baby<br>delivery<br>Shaky | Cool<br>Warmth            |      |    |
| 3              |             |                           | Metallic<br>taste    |                              |                               |                                      | Warmth<br>Shaky                               | Tingling<br>of legs       | Cool |    |
| 8              |             |                           |                      |                              | Cool<br>Shaky                 | Shaky                                |                                               |                           |      |    |
| 9              |             | Blurry<br>vision<br>Shaky |                      | Nausea                       | Shaky<br>Flushing             |                                      |                                               |                           |      |    |
| 10             |             |                           |                      |                              |                               | Sweating                             |                                               |                           |      |    |
| 11             |             |                           | Shaky                | Thinking<br>about<br>Memphis |                               | Feels the<br>roof of<br>the<br>mouth | Energy<br>Cool                                | Sweating<br>Feels<br>good |      |    |

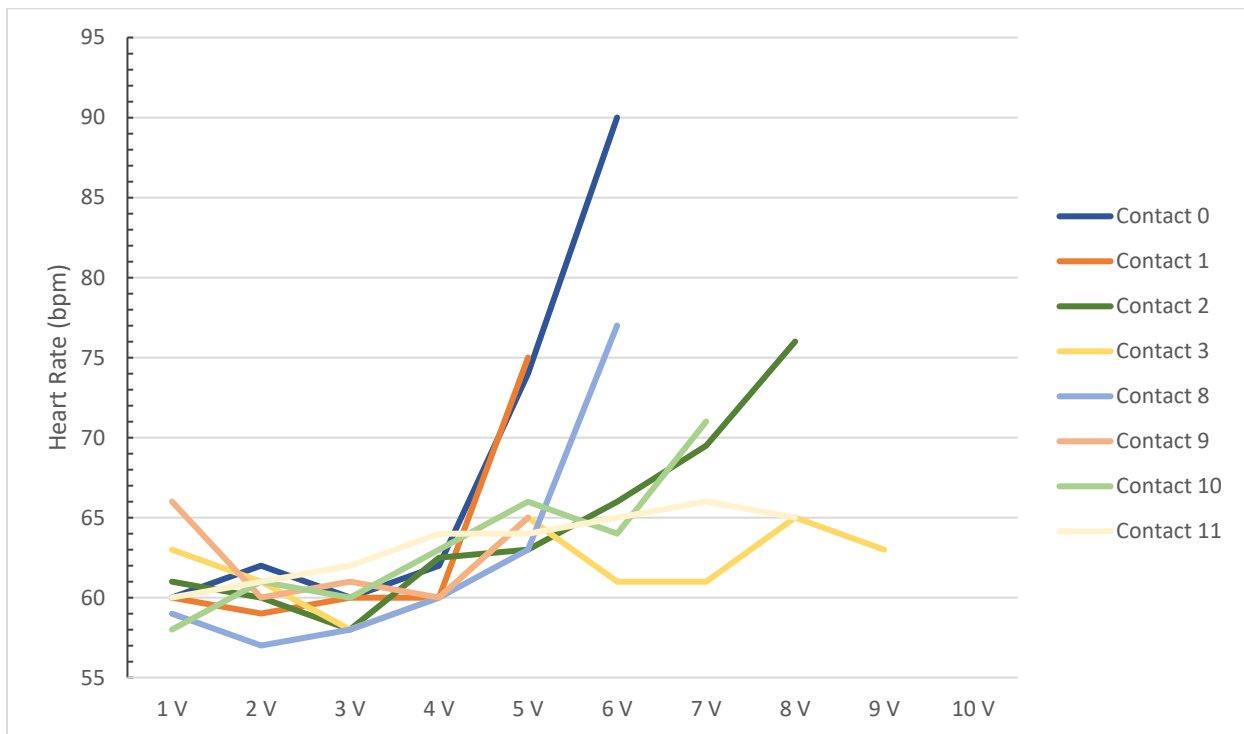



# Patient 26

| Contact number | Voltage (V)             |   |                  |                             |                             |                      |          |                  |   |    |
|----------------|-------------------------|---|------------------|-----------------------------|-----------------------------|----------------------|----------|------------------|---|----|
|                | 1                       | 2 | 3                | 4                           | 5                           | 6                    | 7        | 8                | 9 | 10 |
| 0              |                         |   |                  | Pressure Sensory difference |                             |                      |          |                  |   |    |
| 1              |                         |   |                  |                             | Pressure at arms and chest  | Cool Unusual feeling | Nausea   |                  |   |    |
| 2              |                         |   |                  |                             |                             |                      |          |                  |   |    |
| 3              |                         |   |                  | Not unpleasant feeling      | Feeling something different |                      |          |                  |   |    |
| 8              |                         |   |                  | Warmth                      | Warmth                      |                      |          |                  |   |    |
| 9              | Hard to explain feeling |   |                  |                             | Feeling different           | Warmth Flushing      | Flushing |                  |   |    |
| 10             |                         |   | Pressure in head |                             |                             |                      |          |                  |   |    |
| 11             |                         |   |                  |                             |                             |                      |          | Tightness in jaw |   |    |

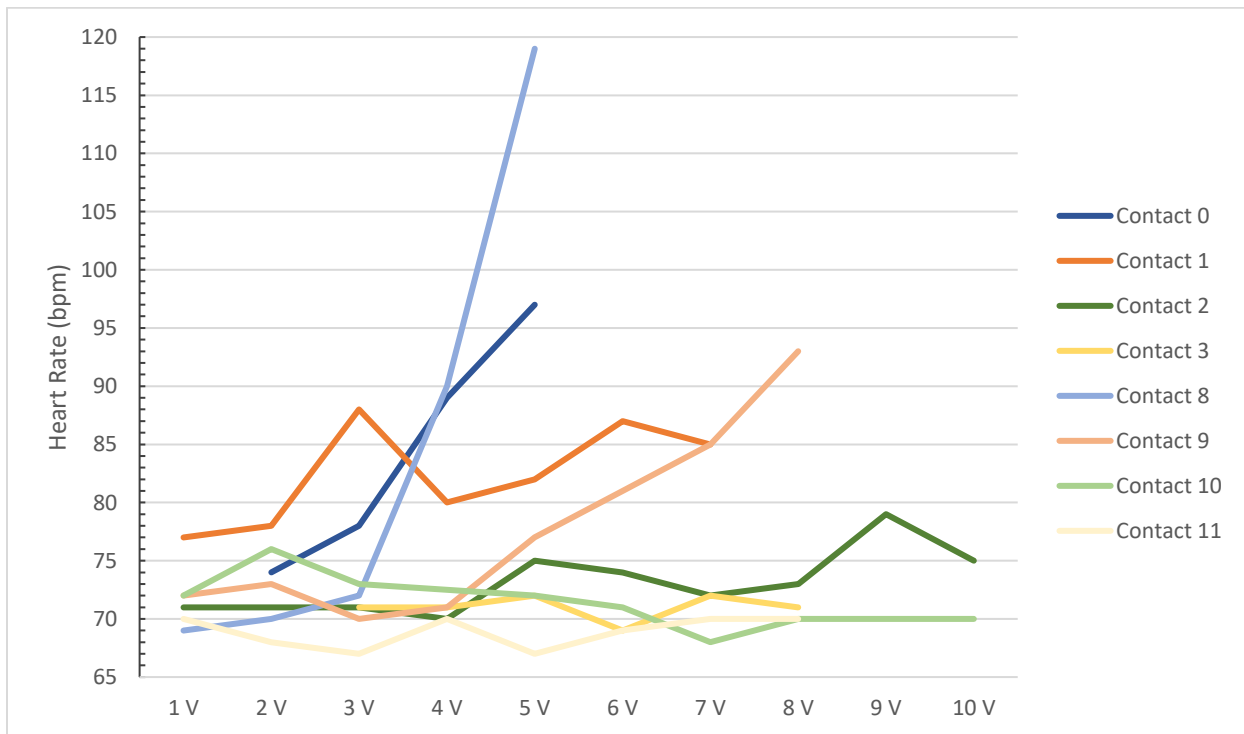

# Patient 27

| Contact number | Voltage (V) |   |                   |                   |                    |                    |                                              |   |        |    |
|----------------|-------------|---|-------------------|-------------------|--------------------|--------------------|----------------------------------------------|---|--------|----|
|                | 1           | 2 | 3                 | 4                 | 5                  | 6                  | 7                                            | 8 | 9      | 10 |
| 0              |             |   | Anxiety<br>Warmth |                   |                    |                    |                                              |   |        |    |
| 1              |             |   |                   |                   |                    |                    | Sweating<br>Warmth<br>Anxiety<br>Lightheaded |   |        |    |
| 2              |             |   |                   |                   |                    |                    |                                              |   |        |    |
| 3              |             |   |                   |                   |                    |                    |                                              |   |        |    |
| 8              |             |   |                   | Nausea<br>Anxiety |                    |                    |                                              |   |        |    |
| 9              |             |   |                   |                   |                    |                    | Nausea                                       |   |        |    |
| 10             |             |   |                   |                   | Warmth<br>Sweating | Warmth<br>Coughing |                                              |   |        |    |
| 11             |             |   |                   |                   |                    |                    |                                              |   | Nausea |    |

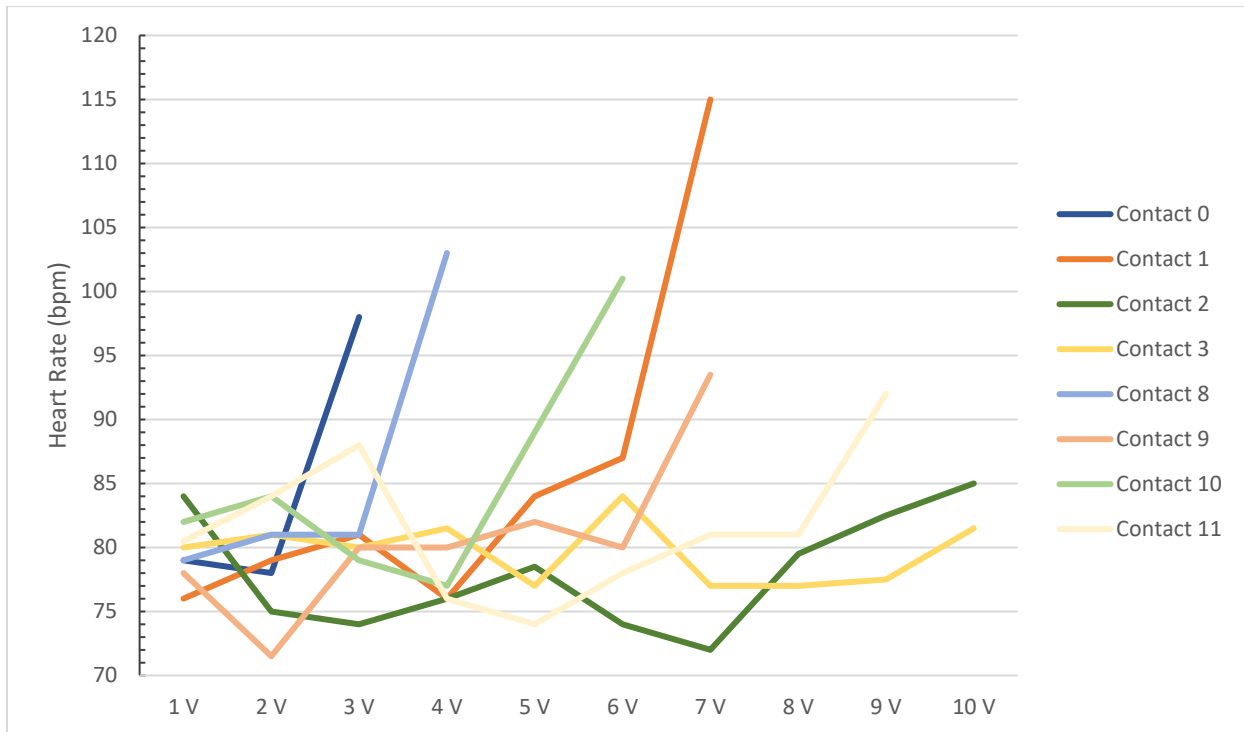

# Patient 28

| Contact number | Voltage (V) |   |                                        |                                                    |                                            |                                                                                           |                                                                       |         |                                |    |
|----------------|-------------|---|----------------------------------------|----------------------------------------------------|--------------------------------------------|-------------------------------------------------------------------------------------------|-----------------------------------------------------------------------|---------|--------------------------------|----|
|                | 1           | 2 | 3                                      | 4                                                  | 5                                          | 6                                                                                         | 7                                                                     | 8       | 9                              | 10 |
| 0              |             |   | Warmth<br>Anxiety                      |                                                    |                                            |                                                                                           |                                                                       |         |                                |    |
| 1              |             |   |                                        |                                                    | Warmth                                     |                                                                                           |                                                                       |         |                                |    |
| 2              |             |   |                                        |                                                    | Bartending<br>memory<br>when<br>younger    | Anxiety<br>Warmth                                                                         |                                                                       |         |                                |    |
| 3              |             |   |                                        |                                                    |                                            | Anxiety                                                                                   |                                                                       |         |                                |    |
| 8              |             |   |                                        |                                                    | Warmth                                     | Anxiety<br>Warmth                                                                         |                                                                       |         |                                |    |
| 9              |             |   | Thoughts<br>running<br>through<br>head | Passing<br>memory<br>Anxiety                       | Warmth<br>Anxiety                          |                                                                                           |                                                                       |         |                                |    |
| 10             |             |   | Passing<br>emotions<br>Thoughts        | Déjà vu<br>like<br>thoughts<br>(can't<br>describe) | Déjà vu<br>(can't<br>describe<br>but good) | Déjà vu                                                                                   | Cool                                                                  |         |                                |    |
| 11             |             |   |                                        |                                                    | College<br>memory<br>from 1978             | More<br>details,<br>describes<br>lighting,<br>temperature,<br>pictures,<br>and<br>windows | More<br>vivid<br>memory<br>of college<br>roommate<br>and<br>apartment | Anxiety | Anxiety<br>Decreased<br>memory |    |

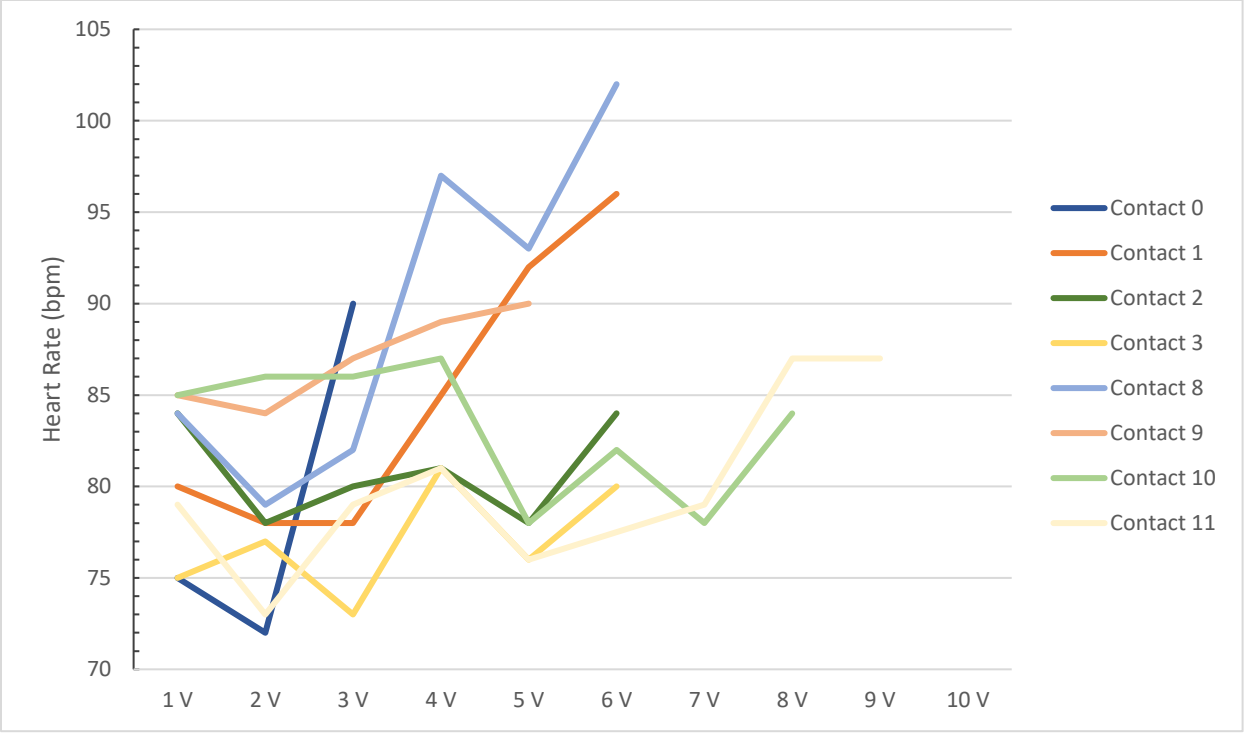

# Patient 29

| Contact number | Voltage (V) |        |   |        |                       |                     |                                                                                                                                                            |                                              |   |    |
|----------------|-------------|--------|---|--------|-----------------------|---------------------|------------------------------------------------------------------------------------------------------------------------------------------------------------|----------------------------------------------|---|----|
|                | 1           | 2      | 3 | 4      | 5                     | 6                   | 7                                                                                                                                                          | 8                                            | 9 | 10 |
| 0              |             |        |   | Warmth |                       |                     |                                                                                                                                                            |                                              |   |    |
| 1              |             |        |   |        | Warmth                |                     |                                                                                                                                                            |                                              |   |    |
| 2              |             |        |   |        |                       | Anxiety             | Warmth                                                                                                                                                     |                                              |   |    |
| 3              |             |        |   |        |                       | Anxiety             |                                                                                                                                                            | Tightness of arm<br>Change in feeling of arm |   |    |
| 8              |             | Warmth |   |        | Tingling of right arm | Sweating<br>Warmth  |                                                                                                                                                            |                                              |   |    |
| 9              |             |        |   |        |                       |                     | Warmth<br>Remembering walking on campus before surgery                                                                                                     |                                              |   |    |
| 10             |             |        |   |        |                       | Warmth in right arm | Flushing<br>Sweating<br>Remembering walking on campus before surgery plus remembering one of the buildings and bikes parked everywhere around the building |                                              |   |    |
| 11             |             |        |   |        |                       |                     | Sweating (carryover)                                                                                                                                       | Warmth right arm                             |   |    |

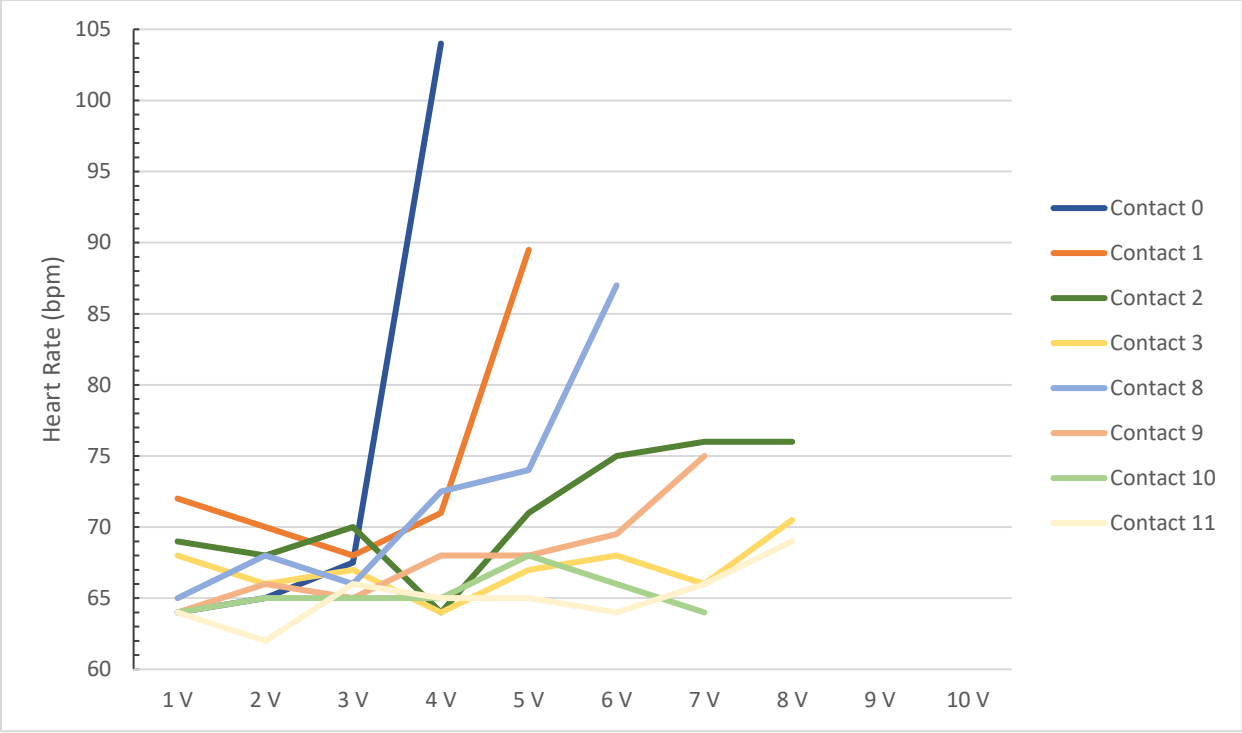

# Patient 30

| Contact number | Voltage (V) |   |                                     |                        |                       |                            |                                       |                            |                            |                                     |
|----------------|-------------|---|-------------------------------------|------------------------|-----------------------|----------------------------|---------------------------------------|----------------------------|----------------------------|-------------------------------------|
|                | 1           | 2 | 3                                   | 4                      | 5                     | 6                          | 7                                     | 8                          | 9                          | 10                                  |
| 0              |             |   | Warmth<br>Tingling of the left hand | Sweating<br>Warmth     |                       |                            |                                       |                            |                            |                                     |
| 1              |             |   |                                     | Lightheaded<br>Anxiety |                       |                            |                                       |                            |                            |                                     |
| 2              |             |   | Tingling of the right arm           |                        | Tingling of both arms | Tingling of both arms      |                                       |                            |                            |                                     |
| 3              |             |   |                                     |                        |                       | Tingling of the IPG pocket | Tingling of the IPG pocket (stronger) | Tingling of the IPG pocket | Tingling of the IPG pocket | Tingling of the IPG pocket (weaker) |
| 8              |             |   |                                     | Lightheaded            |                       |                            |                                       |                            |                            |                                     |
| 9              |             |   |                                     | Lightheaded            |                       |                            |                                       |                            |                            |                                     |
| 10             |             |   |                                     |                        |                       |                            |                                       |                            |                            |                                     |
| 11             |             |   |                                     |                        |                       | Warmth                     | Warmth<br>Tingling of the IPG pocket  | Tingling of the IPG pocket |                            |                                     |

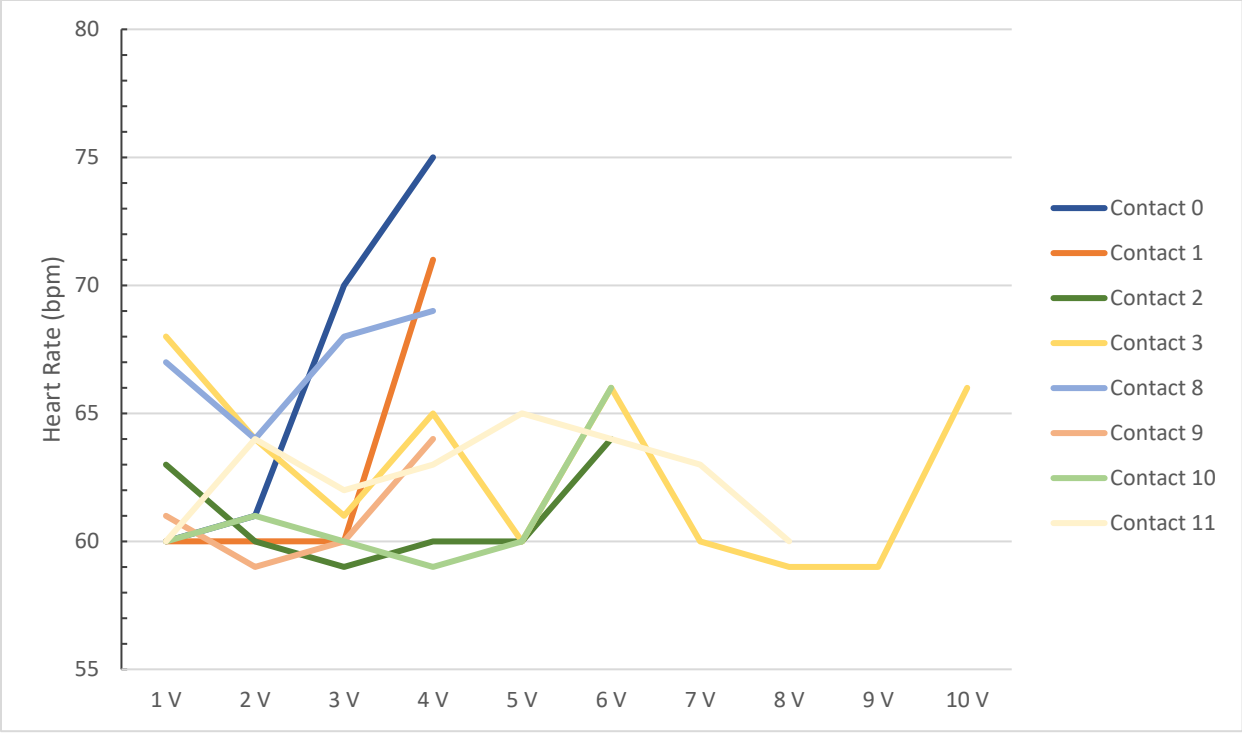



# Patient 31

| Contact number | Voltage (V)                        |                                 |                              |                                |                                                     |                    |                                               |                           |                               |    |
|----------------|------------------------------------|---------------------------------|------------------------------|--------------------------------|-----------------------------------------------------|--------------------|-----------------------------------------------|---------------------------|-------------------------------|----|
|                | 1                                  | 2                               | 3                            | 4                              | 5                                                   | 6                  | 7                                             | 8                         | 9                             | 10 |
| 0              |                                    | Sparkling lights                | Blue and white light flashes | Nausea<br>Flashes of light     | Nausea<br>Warmth<br>Blue and white flashes of light | Warmth             |                                               |                           |                               |    |
| 1              | Warmth of right face<br>Clammy     | Warmth                          |                              | Warmth<br>Nausea<br>Dry mouth  | Nausea<br>Warmth                                    |                    |                                               |                           |                               |    |
| 2              |                                    | Flower smell<br>Sweet fragrance | Warmth<br>Clammy<br>Flushing | Sweating<br>Flushing<br>Nausea | Warmth                                              | Warmth             |                                               |                           |                               |    |
| 3              |                                    |                                 |                              |                                |                                                     | Sweating<br>Warmth |                                               | Pressure on right scapula | Nausea<br>Clammy<br>Dry mouth |    |
| 8              | Nausea<br>Tingling of the forehead |                                 | Barn smell                   | Nausea                         |                                                     |                    |                                               |                           |                               |    |
| 9              |                                    |                                 |                              |                                | Nausea<br>Word finding difficulty                   |                    |                                               |                           |                               |    |
| 10             |                                    |                                 |                              |                                | Cool<br>Clammy<br>Warmth                            | Warmth<br>Sweating | Sweating<br>Warmth<br>Word finding difficulty |                           |                               |    |
| 11             |                                    |                                 |                              | Left chest pain                |                                                     |                    | Right shoulder blade pain                     | Aches<br>Tired            |                               |    |

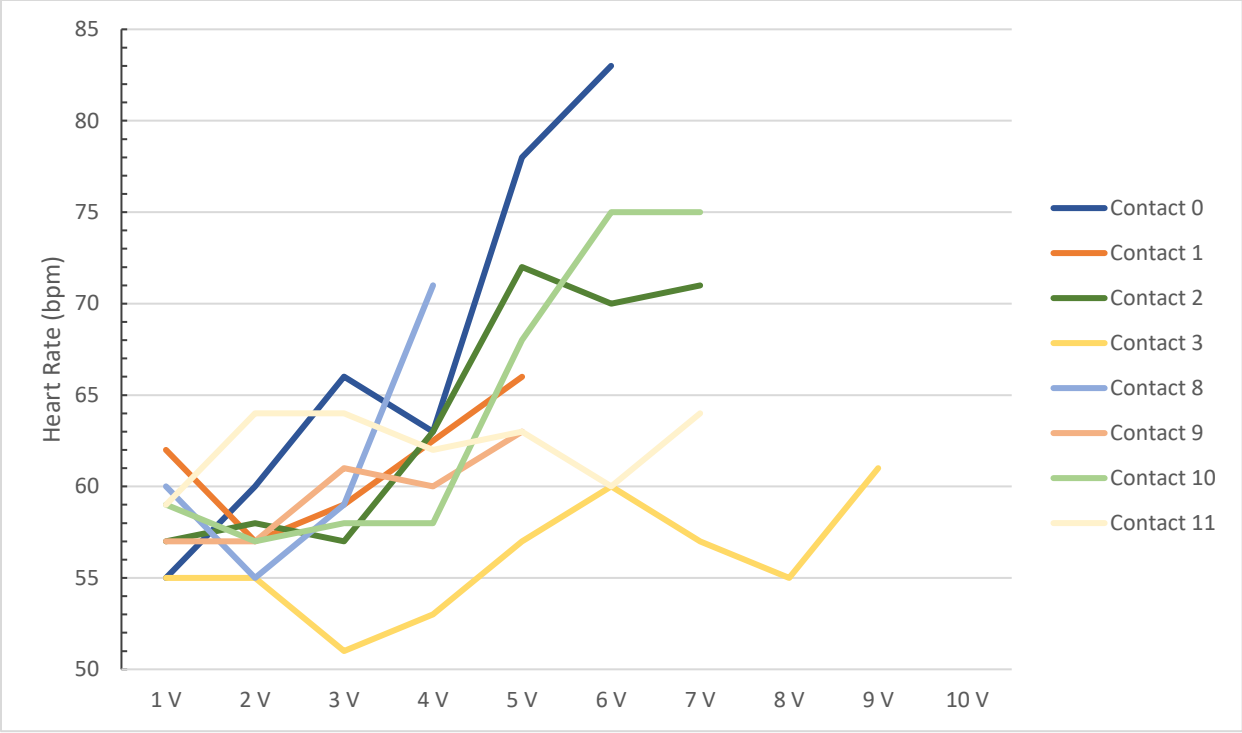

# Patient 32

| Contact number | Voltage (V)           |                          |                     |                                     |           |                  |                                                |                    |                                            |                                     |
|----------------|-----------------------|--------------------------|---------------------|-------------------------------------|-----------|------------------|------------------------------------------------|--------------------|--------------------------------------------|-------------------------------------|
|                | 1                     | 2                        | 3                   | 4                                   | 5         | 6                | 7                                              | 8                  | 9                                          | 10                                  |
| 0              |                       |                          |                     |                                     |           |                  |                                                |                    |                                            |                                     |
| 1              |                       |                          |                     |                                     |           |                  |                                                |                    |                                            |                                     |
| 2              |                       |                          |                     | Warmth<br>(not stimulation induced) |           |                  |                                                |                    |                                            | Warmth<br>(not stimulation induced) |
| 3              |                       |                          |                     |                                     |           |                  |                                                |                    |                                            | Warmth<br>(not stimulation induced) |
| 8              |                       |                          | Dizziness<br>Nausea | Hot flash<br>Warmth                 |           |                  |                                                |                    |                                            |                                     |
| 9              |                       | Dizziness<br>(carryover) | Nausea              |                                     | Dizziness | Warmth<br>Clammy | Sweating<br>Hot flash<br>Clammy                |                    |                                            |                                     |
| 10             | Nausea<br>(carryover) |                          |                     |                                     |           | Warmth           | Warmth<br>(decreased)<br>Thinking about kids   | Sweating<br>Warmth |                                            |                                     |
| 11             |                       |                          |                     |                                     |           |                  | Thinking about sister and going home to Kansas |                    | Thinking about her daughter (reports name) |                                     |

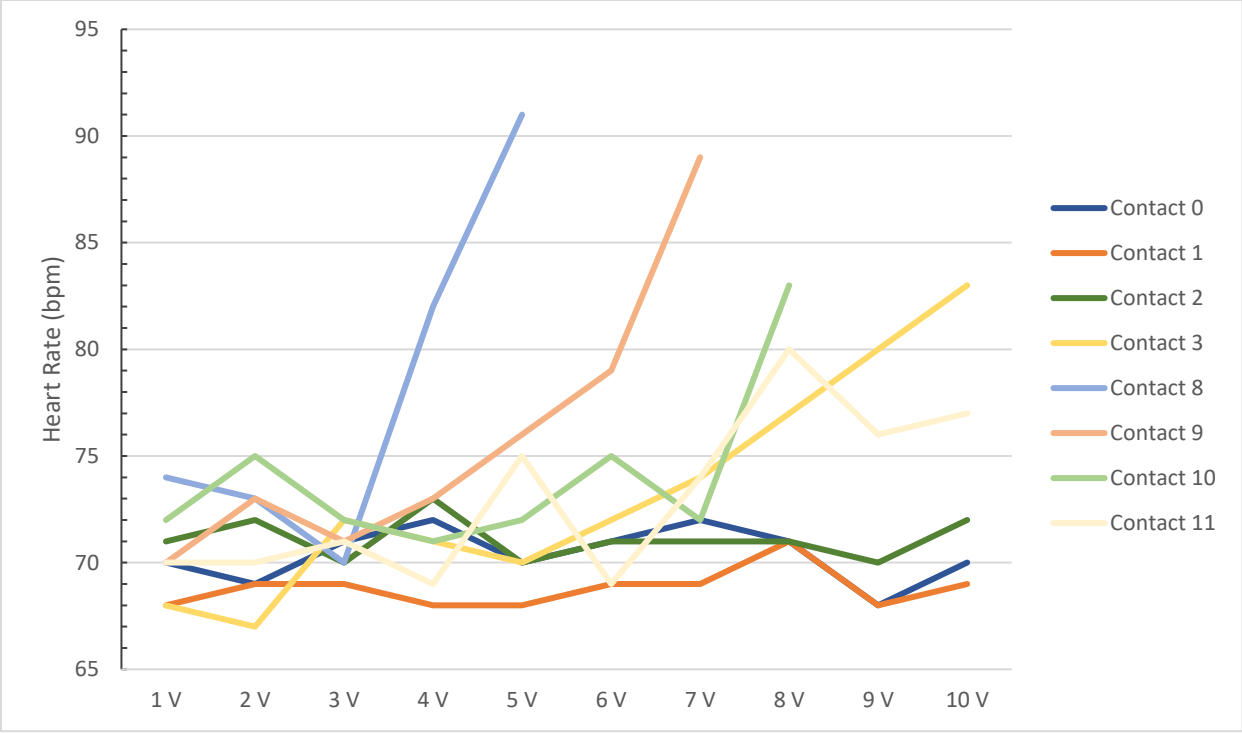

# Patient 33

| Contact number | Voltage (V) |                |                |                                                                         |                                                                                                     |             |                                |                                              |                                           |                                                               |
|----------------|-------------|----------------|----------------|-------------------------------------------------------------------------|-----------------------------------------------------------------------------------------------------|-------------|--------------------------------|----------------------------------------------|-------------------------------------------|---------------------------------------------------------------|
|                | 1           | 2              | 3              | 4                                                                       | 5                                                                                                   | 6           | 7                              | 8                                            | 9                                         | 10                                                            |
| 0              |             |                | Flushing       | Hot flash<br>Sweating                                                   |                                                                                                     |             |                                |                                              |                                           |                                                               |
| 1              |             |                |                |                                                                         | Lightheaded<br>Flushing                                                                             |             |                                |                                              |                                           |                                                               |
| 2              |             |                |                |                                                                         |                                                                                                     |             | Talked about vacation to Aruba | Feeling intoxicated and remembers Margaritas | Tingling of the IPG pocket<br>Lightheaded | Tingling of the IPG pocket<br>Feeling intoxicated (decreased) |
| 3              |             |                |                |                                                                         |                                                                                                     |             | Tingling of the IPG pocket     | Tingling of the IPG pocket                   | Tingling of the IPG pocket                | Tingling of the IPG pocket                                    |
| 8              |             |                |                | Flushing                                                                | Lightheaded<br>Nausea                                                                               |             |                                |                                              |                                           |                                                               |
| 9              |             |                |                | Hot flash<br>Sweating                                                   |                                                                                                     |             |                                |                                              |                                           |                                                               |
| 10             |             |                | Dry mouth      | Cool                                                                    | Lightheaded                                                                                         | Lightheaded | Lightheaded                    |                                              |                                           |                                                               |
| 11             |             | Mentally sharp | Mentally sharp | Feels a "margarita-like" buzz with a feeling of people around the table | Could actually taste the margarita and smell the lime and felt slightly tipsy (from the Aruba trip) |             |                                |                                              |                                           |                                                               |

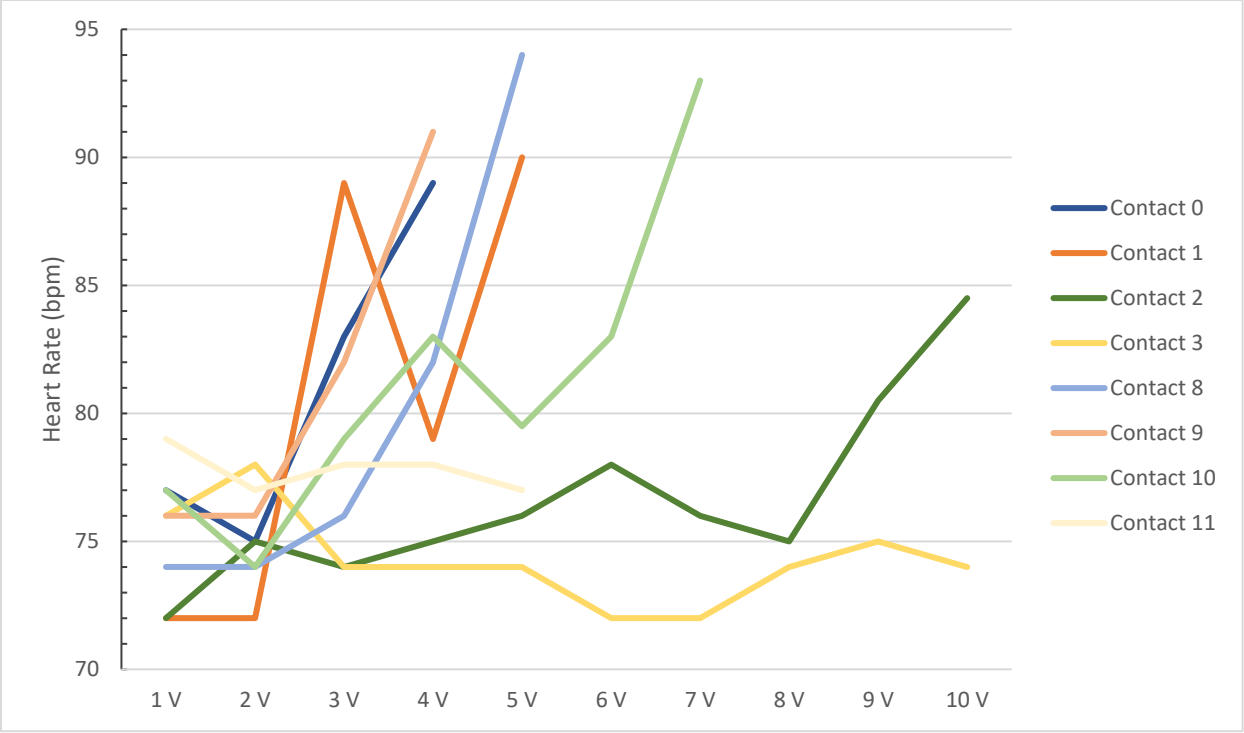

# Patient 34

| Contact number | Voltage (V) |   |                                  |                                |                                       |                                          |                       |   |        |    |
|----------------|-------------|---|----------------------------------|--------------------------------|---------------------------------------|------------------------------------------|-----------------------|---|--------|----|
|                | 1           | 2 | 3                                | 4                              | 5                                     | 6                                        | 7                     | 8 | 9      | 10 |
| 0              |             |   |                                  |                                | Warmth<br>Lightheaded                 |                                          |                       |   |        |    |
| 1              |             |   |                                  |                                |                                       |                                          |                       |   |        |    |
| 2              |             |   | Tingling in hands                |                                | Tingling in hands                     | Warmth                                   | Warmth                |   |        |    |
| 3              |             |   | Tingling in hands                |                                |                                       |                                          |                       |   |        |    |
| 8              |             |   |                                  | Flushed<br>Dizziness<br>Warmth | Dizziness                             |                                          |                       |   |        |    |
| 9              |             |   |                                  |                                | Tingling of the left side of the face | Tingling of the right ear<br>Lightheaded | Warmth<br>Lightheaded |   |        |    |
| 10             |             |   | Aware of the temples of his head |                                | Warmth<br>Flushing                    | Sweating<br>Warmth                       |                       |   |        |    |
| 11             |             |   | Anxiety                          |                                |                                       |                                          |                       |   | Warmth |    |

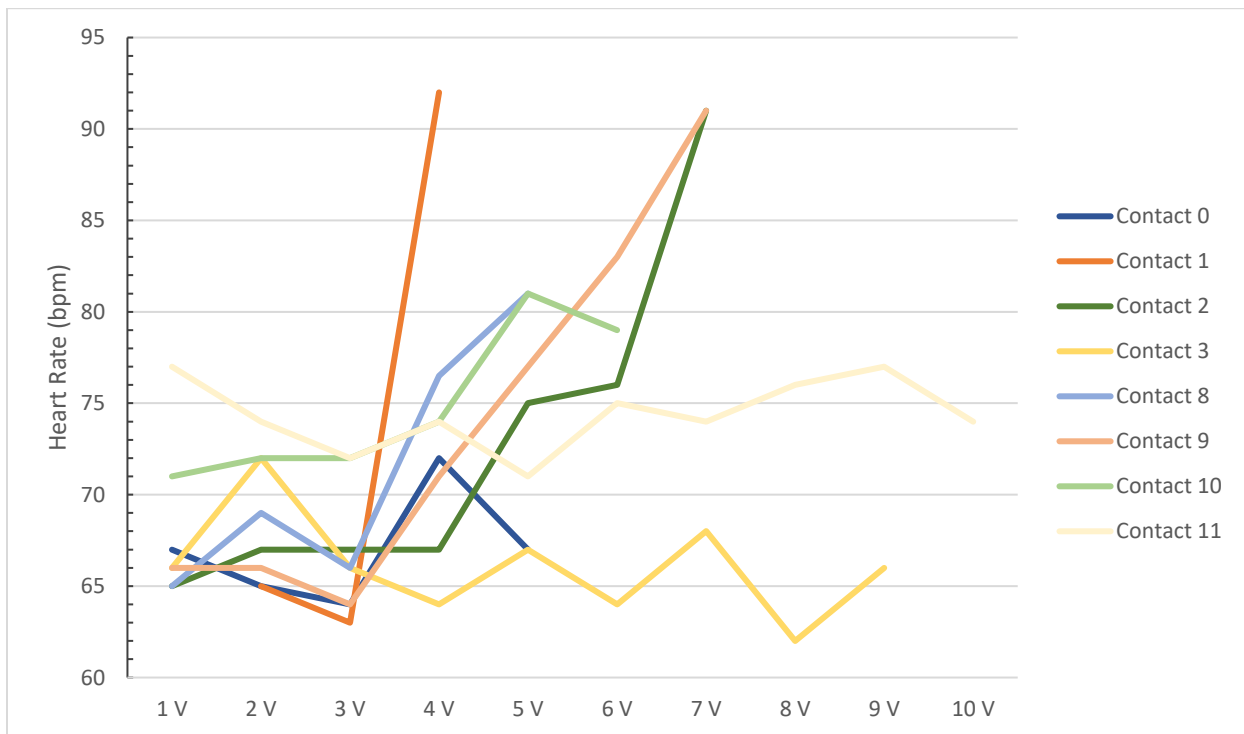

# Patient 35

| Contact number | Voltage (V) |   |        |                                            |                                            |                                                     |                                                    |                                                 |                      |    |
|----------------|-------------|---|--------|--------------------------------------------|--------------------------------------------|-----------------------------------------------------|----------------------------------------------------|-------------------------------------------------|----------------------|----|
|                | 1           | 2 | 3      | 4                                          | 5                                          | 6                                                   | 7                                                  | 8                                               | 9                    | 10 |
| 0              |             |   |        | Tingling in arms (not stimulation induced) | Tingling in arms (not stimulation induced) | Tingling in arms and legs (not stimulation induced) | Cool<br>Tingling in feet (not stimulation induced) |                                                 |                      |    |
| 1              |             |   |        |                                            | Flushing<br>Warmth                         |                                                     |                                                    |                                                 |                      |    |
| 2              |             |   |        | Lightheaded<br>Nausea                      |                                            |                                                     |                                                    |                                                 |                      |    |
| 3              |             |   |        |                                            |                                            |                                                     |                                                    | Numbness of the right thumb<br>Cool<br>Sweating | Flushing<br>Sweating |    |
| 8              |             |   |        |                                            | Anxiety                                    | Lightheaded<br>Clammy<br>(carryover)                |                                                    |                                                 |                      |    |
| 9              |             |   | Nausea | Nausea                                     | Nausea<br>Diarrhea                         |                                                     |                                                    |                                                 |                      |    |
| 10             |             |   |        | Nausea<br>Lightheaded                      |                                            |                                                     |                                                    |                                                 |                      |    |
| 11             |             |   |        |                                            |                                            | Warmth<br>Cool<br>Flushing                          | Cool<br>Warmth<br>Flushing<br>Clammy               | Sweating<br>Warmth<br>Nausea                    |                      |    |



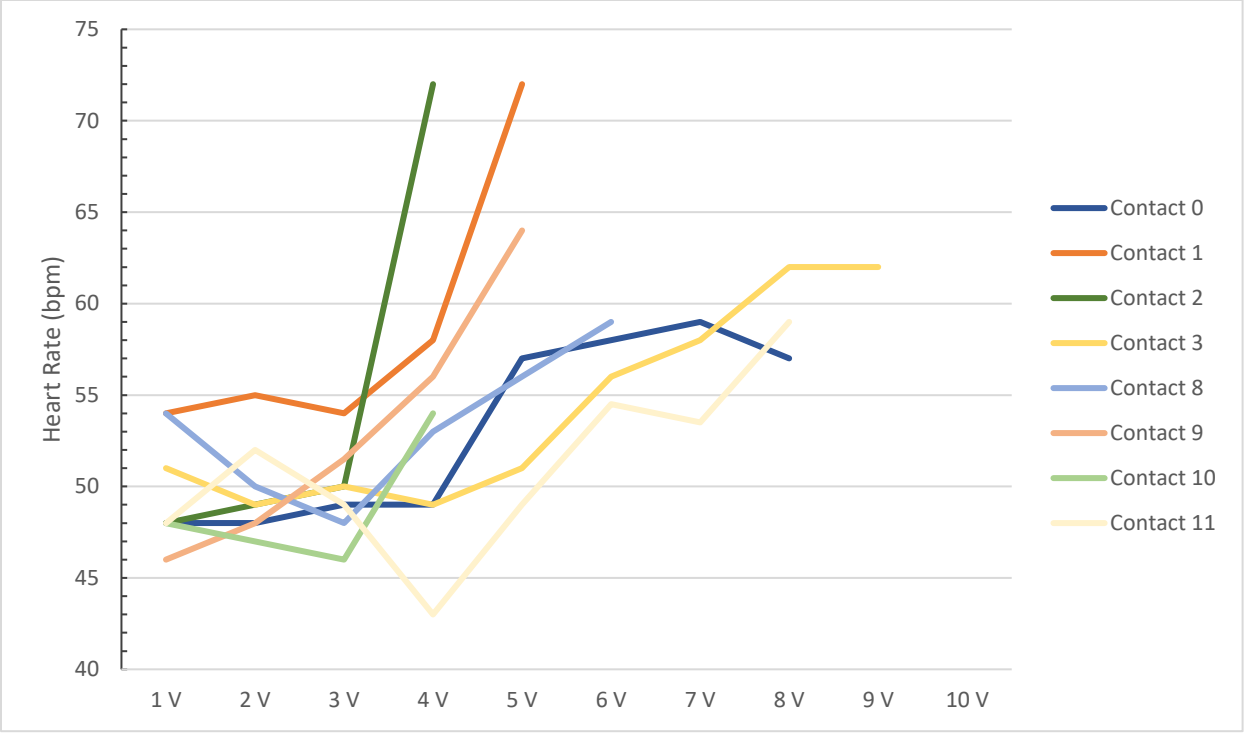

# Patient 36

| Contact number | Voltage (V)     |                     |                                                                                                                        |                                                                |                    |                                                                |                                            |                              |   |    |
|----------------|-----------------|---------------------|------------------------------------------------------------------------------------------------------------------------|----------------------------------------------------------------|--------------------|----------------------------------------------------------------|--------------------------------------------|------------------------------|---|----|
|                | 1               | 2                   | 3                                                                                                                      | 4                                                              | 5                  | 6                                                              | 7                                          | 8                            | 9 | 10 |
| 0              |                 |                     |                                                                                                                        | Warmth<br>Anxiety                                              |                    |                                                                |                                            |                              |   |    |
| 1              |                 | Burping<br>Bloating | Emotional about having a great life<br>Thoughts about his past wife's passing and marrying his current wife of 8 years | Thoughts about his mother and father at the table having lunch | Warmth<br>Flushing | Warmth                                                         |                                            |                              |   |    |
| 2              |                 |                     | Previous thoughts came back                                                                                            | Warmth<br>Thoughts dissipating                                 | Flushing           | Memory of grandmother in her bathrobe                          | Warmth<br>Sweating                         |                              |   |    |
| 3              |                 |                     |                                                                                                                        |                                                                | Warmth             | Memories becoming clearer, now seeing 4 people walking up hill |                                            |                              |   |    |
| 8              |                 |                     |                                                                                                                        |                                                                |                    |                                                                |                                            |                              |   |    |
| 9              |                 |                     |                                                                                                                        |                                                                | Warmth<br>Anxiety  |                                                                |                                            |                              |   |    |
| 10             | Anxiety<br>Cool |                     |                                                                                                                        | Shaky<br>Anxiety<br>Shivers                                    |                    | Flushed<br>Warmth                                              | Sweating                                   |                              |   |    |
| 11             | Cool<br>Anxiety |                     |                                                                                                                        |                                                                |                    |                                                                | Déjà vu<br>Can't remember well<br>Confused | Trying to remember something |   |    |

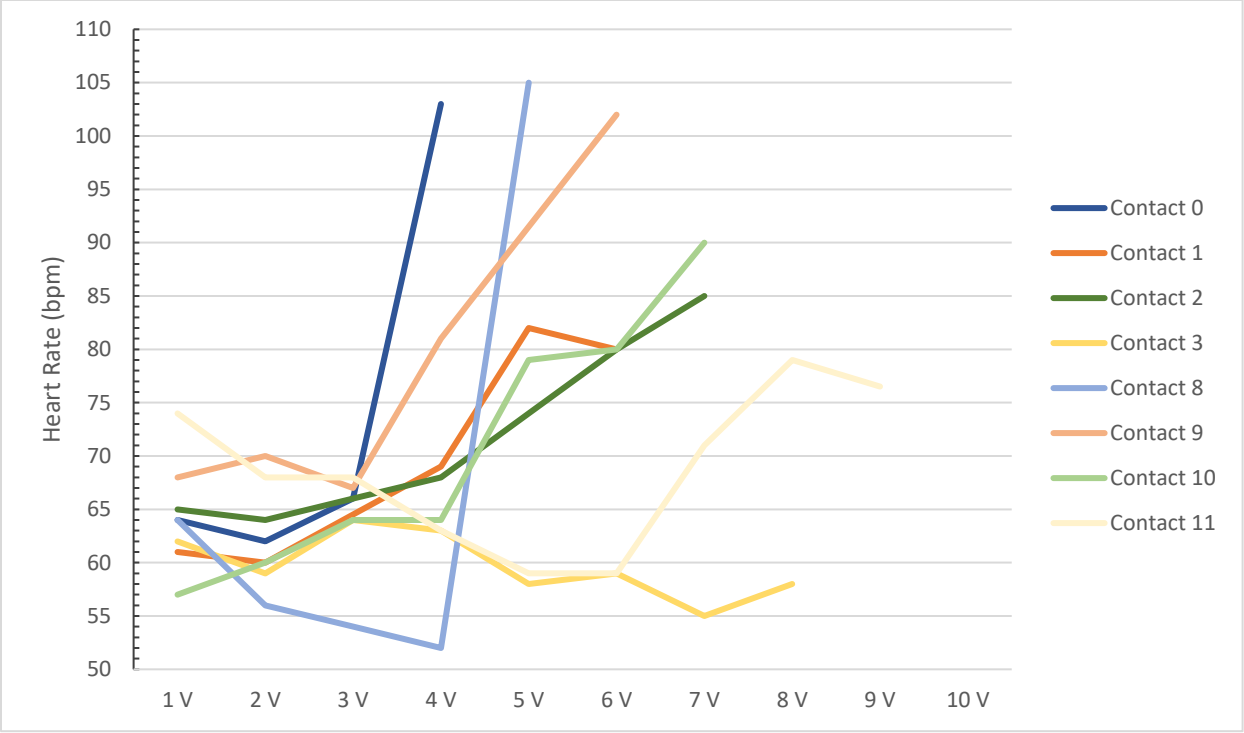

# Patient 37

| Contact number | Voltage (V) |   |                                                                                    |                                                                         |                           |                                                                                                                             |                               |                            |                                     |                                        |
|----------------|-------------|---|------------------------------------------------------------------------------------|-------------------------------------------------------------------------|---------------------------|-----------------------------------------------------------------------------------------------------------------------------|-------------------------------|----------------------------|-------------------------------------|----------------------------------------|
|                | 1           | 2 | 3                                                                                  | 4                                                                       | 5                         | 6                                                                                                                           | 7                             | 8                          | 9                                   | 10                                     |
| 0              |             |   |                                                                                    | Anxiety<br>Warmth                                                       | Warmth<br>Belching        |                                                                                                                             |                               |                            |                                     |                                        |
| 1              |             |   |                                                                                    |                                                                         | Warmth                    | Warmth<br>Flushing                                                                                                          | Warmth<br>Flushing<br>Burping | Warmth<br>Flushing         |                                     |                                        |
| 2              |             |   | Belching                                                                           |                                                                         |                           | Thinking about his wife and sister in the lobby and his sons in Atlanta, he was also thinking of the temperature in Atlanta | Same thoughts as at 6V        | Tingling of the IPG pocket | Tingling of the IPG pocket<br>Alert | Burping<br>Warmth                      |
| 3              |             |   |                                                                                    |                                                                         |                           |                                                                                                                             | Tingling of the IPG pocket    |                            |                                     |                                        |
| 8              |             |   |                                                                                    | Warmth<br>Panic                                                         |                           |                                                                                                                             |                               |                            |                                     |                                        |
| 9              |             |   |                                                                                    |                                                                         | Flushing                  | Warmth<br>Flushing                                                                                                          |                               |                            |                                     |                                        |
| 10             |             |   | Thinking about his wife and sister outside<br>Thinking about his twin sister in IL | Thinking about his older sister<br>Thinking about his mother and father | Thinking about his cousin | Calm                                                                                                                        | Warmth                        |                            | Flushing                            |                                        |
| 11             |             |   |                                                                                    |                                                                         |                           |                                                                                                                             |                               |                            |                                     | Belching<br>Tingling of the IPG pocket |

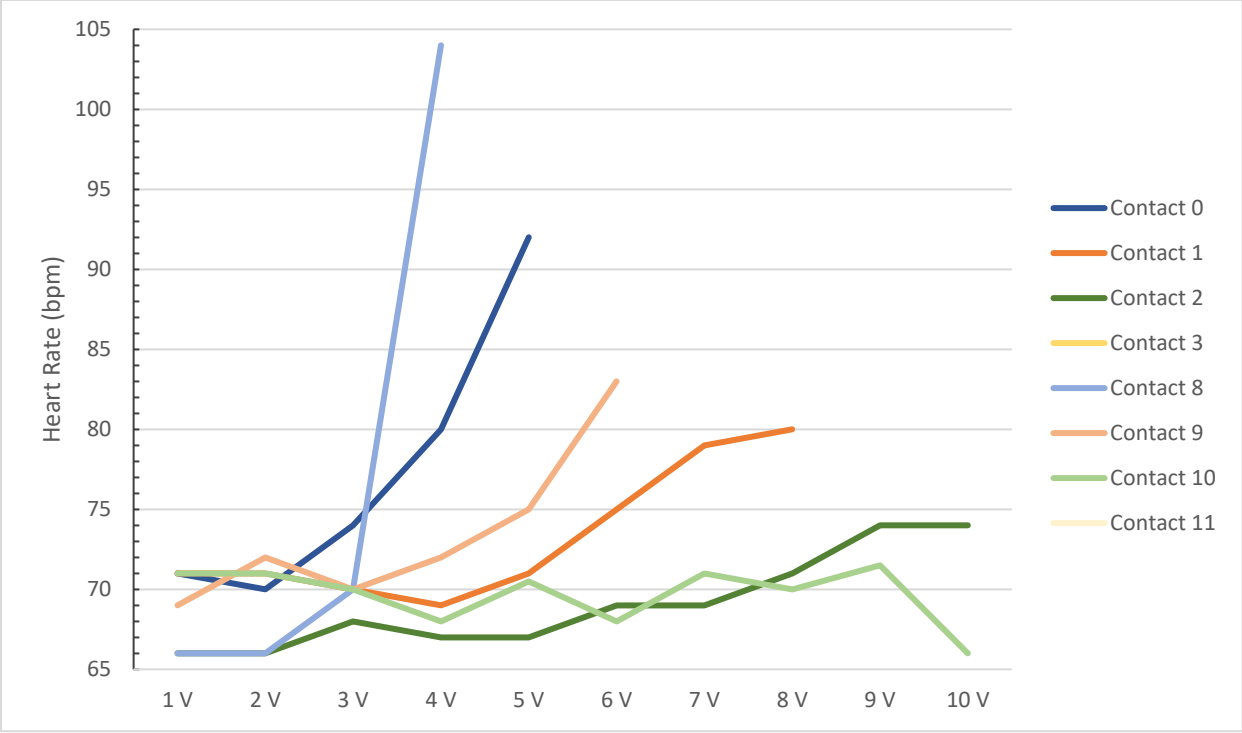

Patient 38

| Contact number | Voltage (V) |                    |        |                                       |                    |                               |                                      |                                      |                     |    |
|----------------|-------------|--------------------|--------|---------------------------------------|--------------------|-------------------------------|--------------------------------------|--------------------------------------|---------------------|----|
|                | 1           | 2                  | 3      | 4                                     | 5                  | 6                             | 7                                    | 8                                    | 9                   | 10 |
| 0              |             |                    |        |                                       | Warmth             |                               | Tingling at the IPG pocket<br>Warmth |                                      |                     |    |
| 1              |             | Warmth (carryover) |        | Flushing                              | Warmth<br>Flushing | Flushing<br>Warmth<br>Burping |                                      |                                      |                     |    |
| 2              |             |                    |        |                                       |                    |                               | Tingling at the IPG pocket           | Warmth<br>Tingling at the IPG pocket | Pulsation in finger |    |
| 3              |             |                    |        | Persistent tingling in the IPG pocket |                    |                               |                                      |                                      |                     |    |
| 8              |             |                    | Warmth | Anxiety                               |                    |                               |                                      |                                      |                     |    |
| 9              |             |                    |        | Warmth                                | Warmth             |                               |                                      |                                      |                     |    |
| 10             |             |                    |        |                                       |                    | Warmth                        | Warmth                               | Warmth                               |                     |    |
| 11             |             |                    |        |                                       |                    |                               |                                      |                                      | Warmth<br>Flushing  |    |

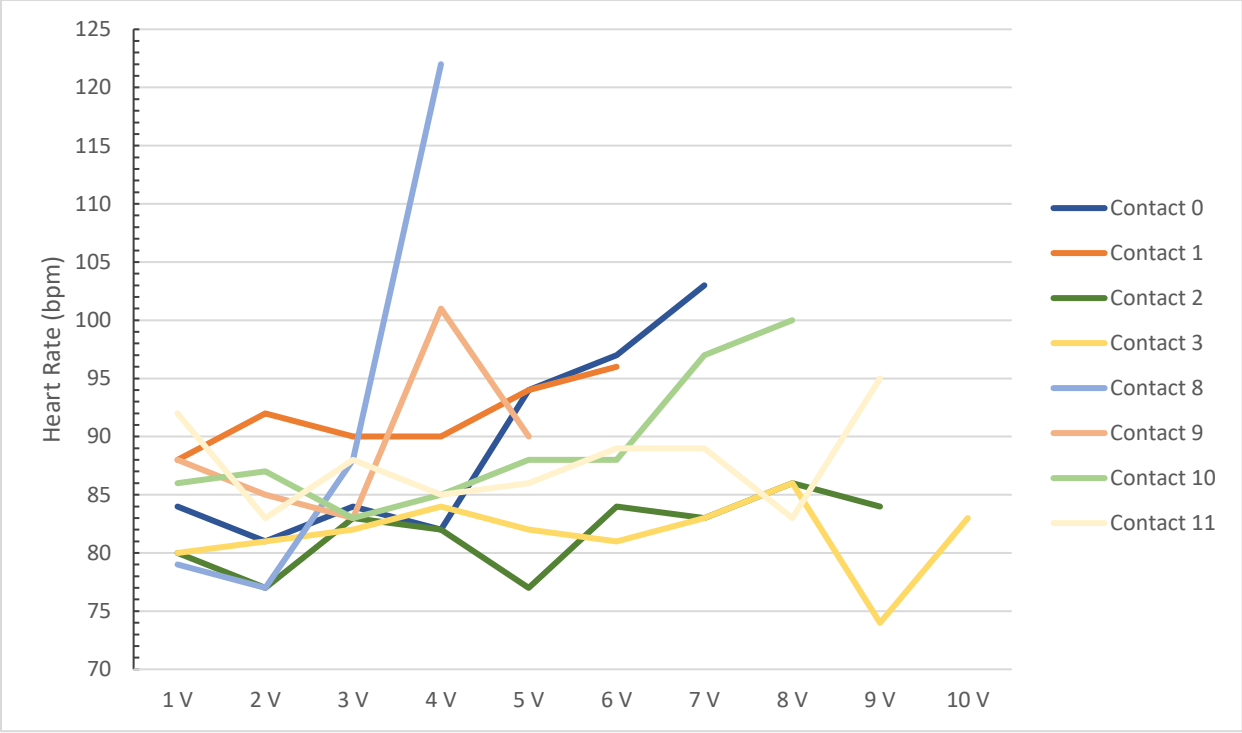

# Patient 39

| Contact number | Voltage (V) |                                    |                               |          |                                 |                    |   |                                                                                                                                                   |                                   |                                                       |
|----------------|-------------|------------------------------------|-------------------------------|----------|---------------------------------|--------------------|---|---------------------------------------------------------------------------------------------------------------------------------------------------|-----------------------------------|-------------------------------------------------------|
|                | 1           | 2                                  | 3                             | 4        | 5                               | 6                  | 7 | 8                                                                                                                                                 | 9                                 | 10                                                    |
| 0              |             |                                    |                               |          | Warmth<br>Sweating<br>Dysphagia |                    |   |                                                                                                                                                   |                                   |                                                       |
| 1              |             |                                    |                               |          | Warmth<br>Sweating              |                    |   |                                                                                                                                                   |                                   |                                                       |
| 2              |             | Feeling of pulled hair on forehead | Tingling of the left forehead | Relaxed  | Warmth<br>Flushed<br>Relaxed    | Warmth<br>Sweating |   |                                                                                                                                                   |                                   |                                                       |
| 3              |             |                                    |                               |          |                                 |                    |   |                                                                                                                                                   |                                   |                                                       |
| 8              |             |                                    |                               | Anxiety  | Panic<br>Burping                |                    |   |                                                                                                                                                   |                                   |                                                       |
| 9              |             |                                    |                               | Warmth   | Flushing<br>Warmth              |                    |   |                                                                                                                                                   |                                   |                                                       |
| 10             |             |                                    |                               | Flushing | Flushing<br>Warmth              |                    |   |                                                                                                                                                   |                                   |                                                       |
| 11             |             |                                    |                               |          |                                 |                    |   | Memories on a lake, it was raining, her battle dress uniform was wet, she was on a white boat with a yellow stripe, and the waves were very vivid | Lake memory continues to be vivid | Memory continues, can't remember the name of the lake |



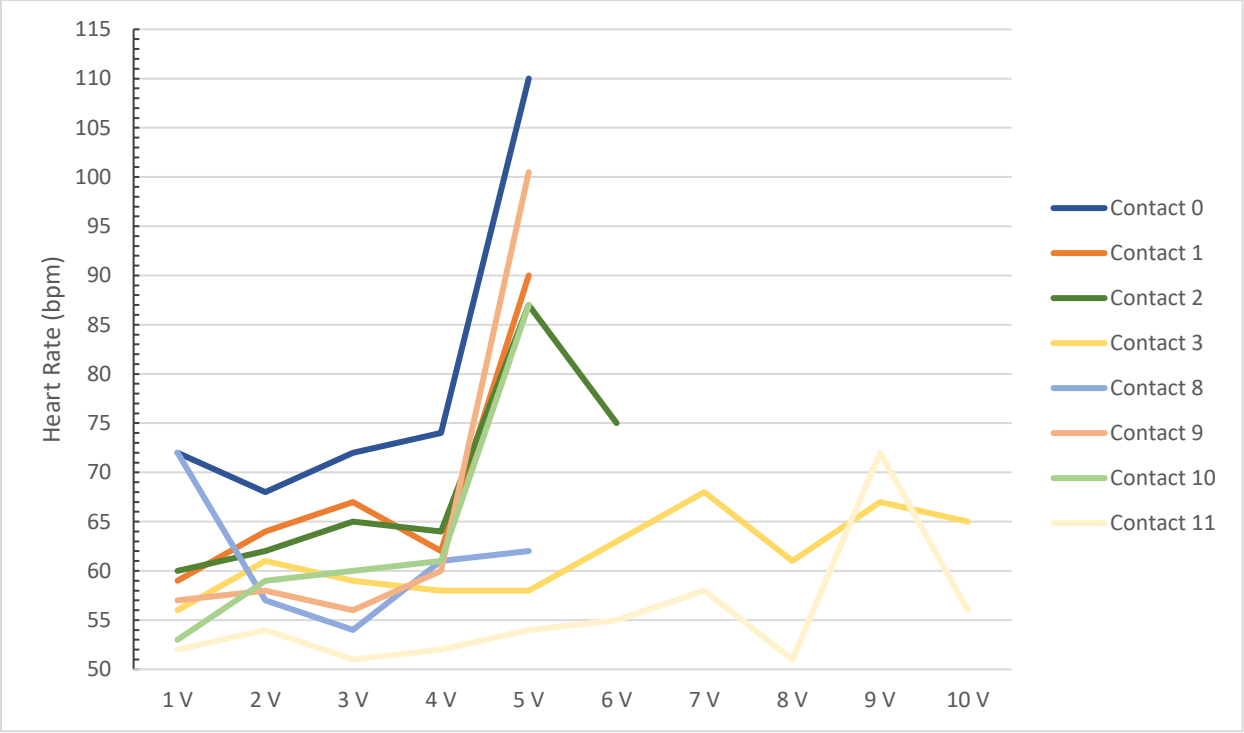

# Patient 40

| Contact number | Voltage (V)         |   |                                  |                 |                   |                         |                 |        |   |    |
|----------------|---------------------|---|----------------------------------|-----------------|-------------------|-------------------------|-----------------|--------|---|----|
|                | 1                   | 2 | 3                                | 4               | 5                 | 6                       | 7               | 8      | 9 | 10 |
| 0              |                     |   |                                  | Cool            |                   |                         |                 |        |   |    |
| 1              |                     |   |                                  | Cool            | Cool Sweating     | Tingling in both legs   |                 |        |   |    |
| 2              |                     |   |                                  |                 |                   | Tingling in both legs   | Warmth Sweating |        |   |    |
| 3              |                     |   | Tension band around his forehead |                 | Sweating          | Tingling in both legs   | Warmth Sweating | Warmth |   |    |
| 8              |                     |   | Anxiety                          | Warmth Sweating |                   |                         |                 |        |   |    |
| 9              |                     |   | Anxiety Shivers                  | Anxiety         |                   |                         |                 |        |   |    |
| 10             | Shivers (carryover) |   |                                  |                 | Warmth            | Warmth of the right arm | Warmth          |        |   |    |
| 11             | Cool (carryover)    |   |                                  |                 | Mind running fast | Mind running fast       | Warmth Sweating |        |   |    |

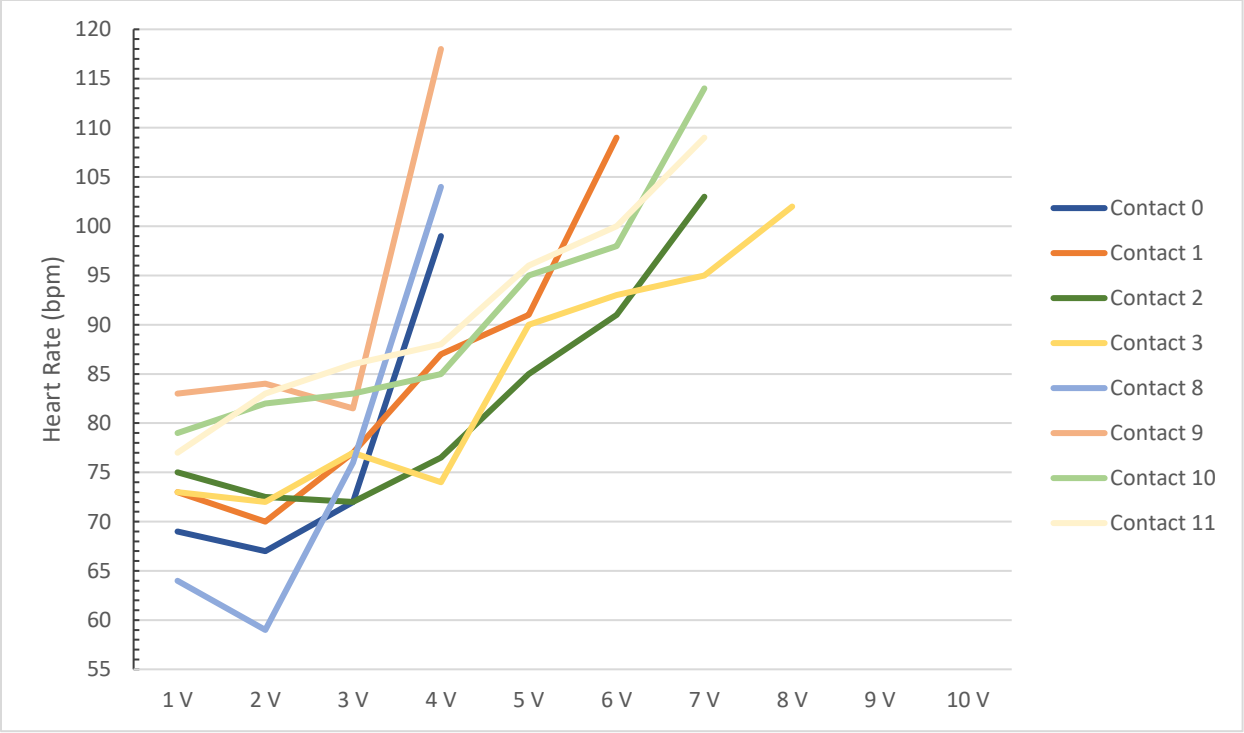

# Patient 41

| Contact number | Voltage (V) |                                   |                                                                    |                                |                                                         |                                                              |                                                                             |                                 |   |    |
|----------------|-------------|-----------------------------------|--------------------------------------------------------------------|--------------------------------|---------------------------------------------------------|--------------------------------------------------------------|-----------------------------------------------------------------------------|---------------------------------|---|----|
|                | 1           | 2                                 | 3                                                                  | 4                              | 5                                                       | 6                                                            | 7                                                                           | 8                               | 9 | 10 |
| 0              |             |                                   |                                                                    | Sweating<br>Flushing           | Warmth<br>Sweating                                      |                                                              |                                                                             |                                 |   |    |
| 1              |             |                                   |                                                                    | Warmth                         | Warmth                                                  |                                                              |                                                                             |                                 |   |    |
| 2              |             |                                   | Story about mother in nursing home                                 |                                |                                                         | Warmth                                                       | Warmth                                                                      | Warmth<br>Nausea                |   |    |
| 3              |             |                                   | Telling stories about riding the wall of death for the second time | Unformed thoughts              |                                                         |                                                              | Telling stories about childhood, specifically 8 <sup>th</sup> grade         | Warmth                          |   |    |
| 8              |             | Cool                              |                                                                    | Cool                           | Warmth<br>Felt the need for bowel movements             |                                                              |                                                                             |                                 |   |    |
| 9              |             |                                   |                                                                    | Mind running fast              | Warmth<br>Felt the need for bladder and bowel movements |                                                              |                                                                             |                                 |   |    |
| 10             |             |                                   | Anxiety<br>Mind racing                                             | Cool<br>Anxiety<br>Mind racing | Anxiety                                                 | Telling story about buying his sister's house in Phoenix, AZ | Sweating<br>Difficulty breathing<br>Difficulty thinking                     | Sweating<br>Difficulty thinking |   |    |
| 11             |             | Story about going to school in IA | Continues story from 2V                                            |                                | Cool                                                    | Anxiety<br>Warmth                                            | Thoughts about school in IA and memories of the room, school, and the house | Warmth<br>Flushing              |   |    |

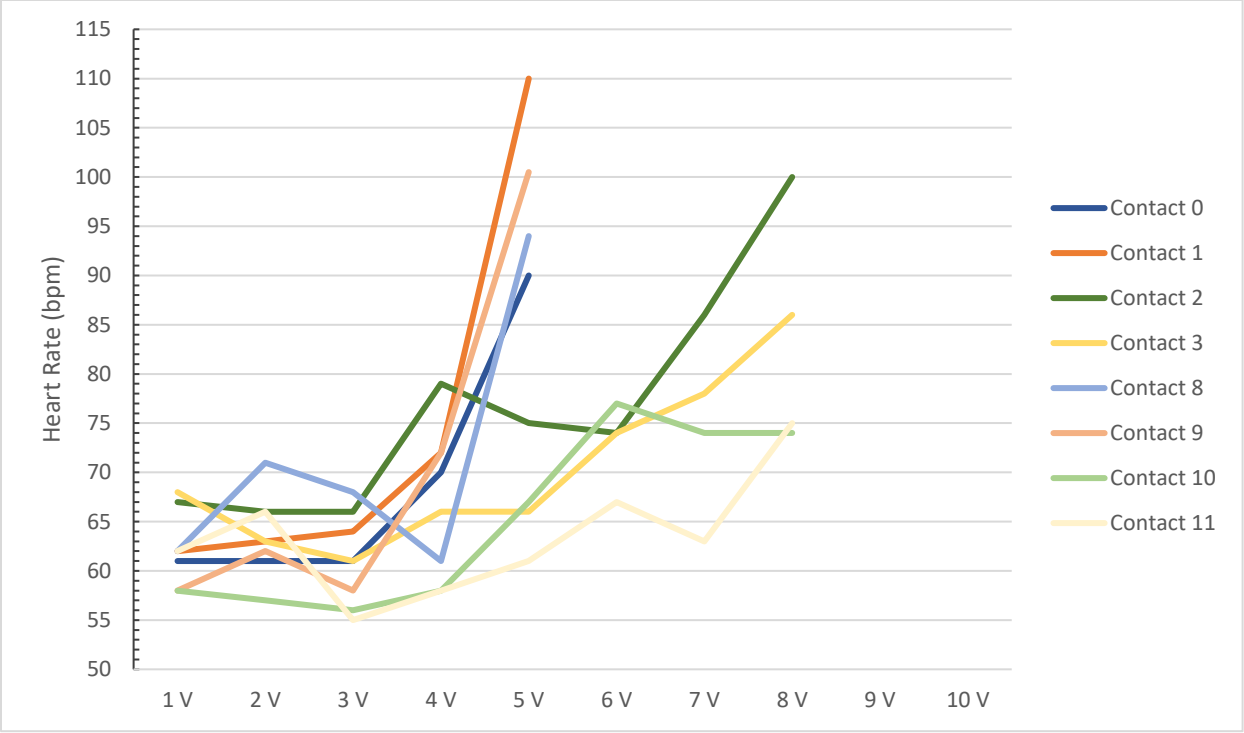

# Patient 42

| Contact number | Voltage (V)               |   |               |                         |                               |               |           |               |                       |    |
|----------------|---------------------------|---|---------------|-------------------------|-------------------------------|---------------|-----------|---------------|-----------------------|----|
|                | 1                         | 2 | 3             | 4                       | 5                             | 6             | 7         | 8             | 9                     | 10 |
| 0              |                           |   |               |                         | Palpitations                  |               |           |               |                       |    |
| 1              |                           |   |               | Tachypnea               | Palpitations<br>Tachypnea     |               |           |               |                       |    |
| 2              |                           |   |               |                         |                               | Mind is blank |           |               | Tachypnea<br>Sweating |    |
| 3              | Tingling of the right arm |   |               | Sweating                |                               |               | Wondering | Mind is blank |                       |    |
| 8              |                           |   |               | Cool                    |                               |               | Tachypnea |               |                       |    |
| 9              |                           |   | Anxiety       | Palpitations<br>Anxiety |                               |               |           |               |                       |    |
| 10             |                           |   | Mind is blank | Tachypnea               | Tachypnea<br>Anxiety<br>Shaky |               | Warmth    |               |                       |    |
| 11             |                           |   | Anxiety       |                         | Sleepy                        |               |           | Sleepy        | Mind is blank         |    |

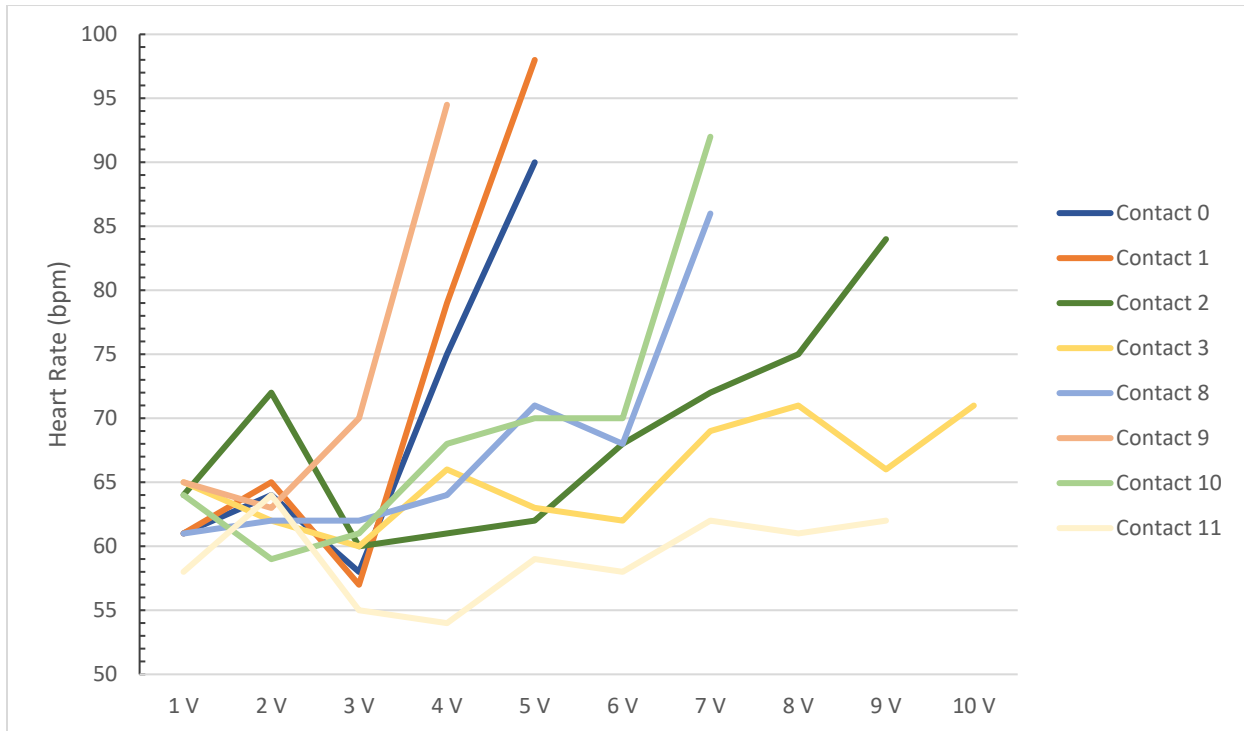

Supplement: NIHMS1548717-supplement-Supplement1.pdf [file NIHMS1548717-supplement-Supplement1.pdf]
